1 **From morphogenesis to pathogenesis: A cellulose loosening protein is one of the most**  
2 **widely distributed tools in nature**

3

4 William R. Chase<sup>1</sup>

5 Olga Zhaxybayeva<sup>2,3</sup>

6 Jorge Rocha<sup>4,†</sup>

7 Daniel J. Cosgrove<sup>1</sup>

8 Lori R. Shapiro<sup>4,§</sup>

9

10 Corresponding author: Lori Shapiro ([Lori.R.Shapiro@gmail.com](mailto:Lori.R.Shapiro@gmail.com))

11

12 <sup>1</sup> Department of Biology, Pennsylvania State University, University Park, PA, USA, 16801

13 <sup>2</sup> Department of Biological Sciences, Dartmouth College, Hanover, NH, USA 03755

14 <sup>3</sup> Department of Computer Science, Dartmouth College, Hanover, NH, USA 03755

15 <sup>4</sup> Department of Microbiology and Immunology, Harvard Medical School, 77 Avenue Louis

16 Pasteur, Boston MA, USA 02115

17 <sup>†</sup> Current Address: Conacyt-Centro de Investigación y Desarrollo en Agrobiotecnología

18 Alimentaria, San Agustin Tlaxiaca, Mexico 42162

19 <sup>§</sup> Current Address: Department of Applied Ecology, North Carolina State University, 100 Brooks

20 Avenue, Raleigh, NC, USA 27695

21

22 Author Contributions: LRS conceived of the study, LRS and WRC designed analysis, WRC and  
23 LRS performed analyses; WRC, OZ, DJC, JR, LRS critically interpreted analyses, LRS wrote  
24 the first draft of the manuscript; WRC, OZ, DJC, JR, LRS contributed manuscript revisions.

25

26 Data Deposition Statement: No new data were generated for this study. The data gathered from  
27 NCBI, and the custom scripts created for this study to analyze these data, are hosted at

28 [https://github.com/will-r-chase/microbe\\_expansin](https://github.com/will-r-chase/microbe_expansin).

29

30

### 31 **Abstract**

32 Plants must rearrange the network of complex carbohydrates in their cell walls during normal  
33 growth and development. To accomplish this, all plants depend on proteins called expansins that  
34 non-enzymatically loosen hydrogen bonds between cellulose microfibrils. Because of their key  
35 role in cell wall extension during growth, expansin genes are ubiquitous, diverse, and abundant  
36 throughout all land plants. Surprisingly, expansin genes have more recently been found in some  
37 bacteria and microbial eukaryotes, where their biological functions are largely unknown. Here,  
38 we reconstruct the phylogeny of microbial expansin genes. We find these genes in all eukaryotic  
39 microorganisms that have structural cellulose in their cell walls, suggesting expansins evolved in  
40 ancient marine microorganisms long before the evolution of land plants. We also find expansins  
41 in an unexpectedly high phylogenetic diversity of bacteria and fungi that do not have cellulosic  
42 cell walls. These bacteria and fungi with expansin genes inhabit varied ecological contexts  
43 mirroring the diversity of terrestrial and aquatic niches where plant and/or algal cellulosic cell  
44 walls are present. The microbial expansin phylogeny shows evidence of multiple horizontal gene  
45 transfer events within and between bacterial and eukaryotic microbial lineages, which may in

46 part underlie their unusually broad phylogenetic distribution. Taken together, we find expansins  
47 to be unexpectedly widespread in both bacterial and eukaryotic genetic backgrounds, and that the  
48 contribution of these genes to bacterial and fungal ecological interactions with plants and algae  
49 has likely been underappreciated.

50

## 51 **Importance**

52 Cellulose is the most abundant biopolymer on earth. In plant cell walls, where most global  
53 cellulose biomass is found, cellulose microfibrils occur intertwined with hemicelluloses and  
54 pectins. The rigidity of this polysaccharide matrix provides plant cell walls with structural  
55 support, but this rigidity also restricts cellular growth and development. Irreversible, non-  
56 enzymatic loosening of structural carbohydrates by expansin proteins is key to successful cell  
57 wall growth in plants and green algae. Here, we find that expansin genes are distributed far more  
58 broadly throughout diverse bacterial and fungal lineages lacking cellulosic cell walls than  
59 previously known. Multiple horizontal gene transfer events are in part responsible for their  
60 unusually wide phylogenetic distribution. Together, these results suggest that in addition to being  
61 the key evolutionary innovation by which eukaryotes remodel structural cellulose in their cell  
62 walls, expansins likely have remarkably broad and under-recognized utility for microbial species  
63 that interact with plant and algal structural cellulose in diverse ecological contexts.

64

## 65 **Introduction**

66 Cellulose – a linear polysaccharide comprised of hundreds to thousands of D-glucose  
67 units – is the most abundant biopolymer on Earth. The vast majority of global cellulose biomass  
68 is present in plant cell walls, where cellulose microfibrils are interlinked with hemicelluloses and

69 pectins to provide structural support (1-3). This carbohydrate and protein matrix allows plant cell  
70 walls to withstand high tensile stresses, which can reach as high as 1000 atmospheres during  
71 growth (4). The strength of the structural carbohydrates in the cell wall also creates a formidable  
72 physical barrier against pathogenic microorganisms (5). Cellulosic cell walls similar in structure  
73 to those in plants also occur in some algal and other microbial eukaryotic groups (6-8). Tunicates  
74 (Urochordata) are the only metazoan group known to use cellulose structurally, and are thought  
75 to have acquired cellulose synthase genes horizontally from bacteria (9-11).

76 All of these diverse organisms are confronted with the dilemma of how to loosen their  
77 cellulose-based matrix of structural carbohydrates in order to expand their cell walls during  
78 normal growth and development. In plants and some green algae, non-enzymatic proteins called  
79 expansins provide the most important structural cellulose loosening functions, and are most  
80 highly expressed during active growth in any tissue where cell wall extension is critical (12-20).  
81 Expansin proteins are tightly packed two-domain structures of 200-250 amino acids with a  
82 planar polysaccharide binding surface (Supplemental Figure 1). The N-terminal domain is  
83 related to family 45 glycoside hydrolases, but lacks lytic activity. The C-terminal domain is  
84 related to group 2 grass pollen allergens (2, 21-25).

85 Expansin genes are universally present in all species of land plants, and most plant  
86 genomes contain multiple expansin homologs (26-28). In vascular plants, expansins have  
87 diversified from a common ancestor into four distinct genetic subfamilies. Two of these  
88 subfamilies,  $\alpha$  and  $\beta$  expansins, have been empirically shown to cause irreversible cell wall  
89 extension (2, 3, 26, 29, 30). The gene sequences of the two remaining subfamilies, expansin-like  
90 families A and B (EXLA and EXLB, respectively), contain both canonical expansin domains but  
91 no EXLA or EXLB have yet been functionally characterized. The current working hypothesis for

92 expansin mode of action is non-enzymatic disruption of hydrogen bonds at biomechanical  
93 hotspots between cellulose microfibrils, or between cellulose microfibrils and hemicellulose.  
94 Interruption of hydrogen bonds allows slippage of carbohydrate polymers (*ie*, ‘loosening’) at  
95 load bearing elements of the cell wall, and is distinct from the action of hydrolytic enzymes. This  
96 structural carbohydrate loosening causes water uptake and irreversible extension of the cell wall  
97 without compromising tensile strength (19, 30, 31). The ubiquity of expansins in land plants and  
98 some green algae, the phylogenetic diversity of expansins in vascular plants, and their essential  
99 role in cell wall growth underlies the hypotheses that expansins may have first evolved in green  
100 algae and then diversified in land plants, and that these genes were necessary for the evolutionary  
101 success and adaptive radiation of the Plantae lineage (32-36).

102         What has long remained unknown is the distribution and function of expansin genes in  
103 non-Plantae organisms – especially those that do not have cellulosic cell walls (32, 37-40).  
104 Fungal and bacterial genes predicted to have similar structure as  $\beta$ -expansins were first identified  
105 once databases began storing large numbers of genomic sequences. These microbial expansin-  
106 like genes were assigned to a newly established EXLX subfamily (22, 23). The first bacterial  
107 expansin gene with the predicted two domain structure of a plant expansin to be identified was a  
108 single copy expansin gene (*Exlx1*) from the rhizosphere plant commensal bacterium, *Bacillus*  
109 *subtilis*. This gene, referred to by expansin naming convention as *BsExlx1*, is highly divergent  
110 from plant expansins at the amino acid sequence level, but contains a conserved aspartic acid in  
111 domain 1 that is crucial for cell wall extension, and linear aromatic residues in domain 2 that are  
112 essential for polysaccharide binding (Supplemental Figure 1) (23, 38).

113         *Bacillus subtilis*, like many species of bacteria, utilizes cellulose as part of an  
114 extracellular biofilm matrix, but does not use cellulose as a cell wall structural component (41,

115 42). Functional characterization found that BsExl1 significantly increases the efficiency of  
116 epiphytic maize root colonization by *B. subtilis*, despite showing 10 times less *in vitro* cell wall  
117 loosening activity than plant expansins (23). This suggests that the function of expansins in  
118 microbial backgrounds may be to facilitate colonization of hosts that produce cellulosic cell  
119 walls (43-48). Since this first characterization of an expansin gene in a bacterium, additional  
120 EXLX family expansin genes have been identified in phylogenetically diverse bacteria, fungi  
121 and some microbial eukaryotes (reviewed in (32, 33)). Like plant expansins, no microbial  
122 expansins have been documented to have enzymatic activity (38, 49-54). Microbial expansin  
123 evolutionary history, taxonomic distribution, mechanism(s) of action, and ecological function(s)  
124 remains enigmatic in non-Plantae genetic backgrounds, and there is currently no framework for  
125 predicting their functional roles (38, 40, 51, 55-57).

126       Here, we examine the phylogenetic distribution of microbial expansin genes, and infer  
127 their possible ecological roles through four steps. First, we searched for expansin genes in all  
128 non-Plantae records of GenBank, and reconstruct the phylogeny of microbial expansin homologs  
129 in the context of the broader tree of life. Second, we consider the distribution of expansin genes  
130 relative to the life history of microorganisms that have them. Third, we analyze the microbial  
131 expansin phylogeny for signals of horizontal gene transfer, and hypothesize how ecological  
132 factors may be driving transfer of this gene between distantly related microbial taxa. Finally, we  
133 examine ongoing evolution through fusions with carbohydrate active proteins. Together, these  
134 analyses indicate that microbial expansins are more widely utilized by microorganisms than  
135 previously recognized, and that their distribution is in part driven by an underestimated  
136 importance for mediating bacterial and fungal interactions with live and dead plant and algal  
137 matter.

138

## 139 **Results**

### 140 *Phylogenetic distribution of expansin genes across the tree of life*

141           We surveyed the NCBI *nr* database (accessed Jan 2017) and identified a total of 600  
142 unique expansin sequences in 491 species, in addition to those known in green algae  
143 (Chloroplastida) and terrestrial plants (Embryophyta) (Table 1, Supplemental Table 1). These  
144 491 species with expansin homologs are comprised of macroscopic and microscopic organisms  
145 widely distributed across the tree of life (Figure 1). In Archaeplastida, expansins are present in  
146 red algae (Rhodophyta), which use cellulose as their main cell wall structural carbohydrate, and  
147 in *Cyanophora paradoxa*, the sole publicly available Glaucophyta genome sequence  
148 (Supplemental Table 2) (58). Glaucophyta are a rare and largely uncharacterized Archaeplastid  
149 group that likely diverged prior to the split between the red (Rhodophyta), and green  
150 (Chloroplastida) algal lineages (58, 59).

151           Few expansin genes occur in Metazoans (Supplemental Table 3). Tunicates are the only  
152 metazoan group known to use cellulose structurally, and acquired their cellulose synthase genes  
153 horizontally from bacteria (11, 60, 61). *Oiklopeura dioica* is the sole tunicate species with a  
154 sequenced genome, and it contains an annotated expansin gene. Expansin genes are also  
155 annotated in several species of marine bivalves whose diets are partially plant matter or algae.  
156 For the sole glaucophyte and the few metazoans with annotated expansin homologs, it remains  
157 empirically unconfirmed whether their expansin genes are *bona fide* cellular genes, or  
158 sequencing contamination from digestive contents or other plant or microbial DNA (62, 63).  
159 Many plant pathogenic nematodes have proteins with partial functional and structural overlap  
160 with expansins, but their domain structure is reversed compared to the canonical plant and

161 microbial expansin proteins. The evolutionary relationship of nematode expansin-like proteins to  
162 plant or microbial expansins remains unclear (30, 38, 64), and functional similarities in plant cell  
163 wall loosening function may be an example of convergent evolution.

164 In non-Archaeplastida eukaryotic microbes, Exlx homologs are present in both major  
165 lineages of Amoebozoa, one Alveolate (*Vitrella brassicaformis*), one Haptophyte (*Emiliana*  
166 *huxleyi*), and multiple lineages of Stramenopiles. Few species from these groups have sequenced  
167 and well-annotated genomes, and it is likely that more expansin homologs will be identified as  
168 more species from these lineages have their genomes sequenced and annotated. *E. huxleyi* and  
169 some Stramenopile lineages with expansin genes (such as Phaeophytes) are photosynthetic  
170 marine organisms with cellulosic cell walls. Many Amoebozoa and terrestrial Stramenopiles also  
171 have cellulosic cell walls. In the slime mold *Dictyostelium discooidum* (Amoebozoa), expansin  
172 genes are expressed while structural cellulose is being rearranged during fruiting body  
173 development (8). It is likely that *D. discooidum* – and other microbial eukaryotes with cellulosic  
174 cell walls – use expansins to modify their own structural cellulose. Many Oomycetes (a group of  
175 non-photosynthetic Stramenopiles) have expansin genes, but it remains unclear whether  
176 oomycetes use expansins for morphogenesis, interactions with plant cell walls, or both. All  
177 oomycetes with annotated expansin genes use cellulose structurally and have multiple expansin  
178 homologs per genome (Supplemental Table 1) which both suggest functions related to  
179 morphogenesis. However, these same oomycetes colonize plants as hosts and some are among  
180 the world's worst agricultural plant pathogens, suggesting possible function(s) related to plant  
181 colonization (65-69).

182 Expansin genes are not detected in Archaea, but EXLX homologs are present in an  
183 unexpectedly diverse assortment of fungal and bacterial taxa. While many bacteria secrete



184 cellulose as part of an extracellular biofilm matrix, none are known to utilize cellulose as a  
185 structural component of their cell walls (41, 42). Expansins are most abundant in Actinobacteria,  
186 Firmicutes, Myxobacteria,  $\gamma$ -Proteobacteria and  $\beta$ -Proteobacteria, and are also present in some  
187 Chloroflexi, Bacteroidetes, Cyanobacteria and Verrucomicrobia. In fungi, none of which are  
188 known to use cellulose structurally, most expansin genes are in Ascomycota, and fewer  
189 expansins are in Basidiomycota, Chytrid fungi and symbiotic ectomycorrhizal fungi  
190 (Supplemental Table 4).

191

### 192 *Diversity of ecological niches inhabited by microbes with expansin genes*

193         Since the first discovery of an expansin gene in a bacterium, it was hypothesized that  
194 most microbial expansins function as virulence factors (23, 25, 30, 33, 53). However, we find  
195 that only 28% (138 out of 491) of microbial species with expansins are plant pathogens (Figure  
196 2, Supplemental Table 4). More than half (290 out of 491, or 59%) are described as plant  
197 commensals, soil inhabitants, or saprophytes – ecological contexts where microbes non-  
198 pathogenically interact with live plants and/or decaying plant matter (70). The remaining 13% of  
199 expansin-containing microbes inhabit a variety of terrestrial or aquatic ecological contexts, all of  
200 which have in common the presence of live or dead plant or algal matter.

201         Bacteria comprise 61.3% (301 out of 491) of microbial species with expansin genes.  
202 Especially notable are Myxobacteria, where 85% (22 out of 26) of sequenced species have  
203 expansin genes (Table 1), suggesting that their ecological importance as saprophytes has been  
204 overshadowed by their use as laboratory models to understand bacterial multicellular behavior  
205 (71, 72). The Actinobacterial genera *Streptomyces*, *Nocardia*, and *Micromonospora* have many  
206 species with expansin genes. Numerous *Streptomyces* are plant growth promoters or pathogens,

207 but *Nocardia* and *Micromonospora* are predominantly known as soil inhabitants and have few  
208 (or no) described plant associations (Supplemental Table 4) (73, 74). The high frequency of  
209 expansin genes suggests that microbial associations with live plants or dead plant matter is likely  
210 more common, and more ecologically important, for these actinobacterial genera than is  
211 currently recognized.

212 Many expansin genes are found in known plant growth promoting rhizobacteria,  
213 including strains of *Streptomyces*, *Bacillus*, *Micromonospora*, and *Rhizobacter*. In these species,  
214 expansin may function similarly to *B. subtilis* (23), and increase epiphytic colonization efficiency  
215 of plant roots. Only 15% of bacterial species (46 out of 301) with expansin genes are  
216 phytopathogens, and most of those pathogens occur in two  $\gamma$ -proteobacterial lineages,  
217 Xanthomonadaceae and Enterobacteriaceae. Other bacterial plant pathogens are sparsely  
218 scattered throughout the tree, and include economically important strains of *Ralstonia*,  
219 *Acidovorax*, *Streptomyces* and *Clavibacter michiganensis*. A conspicuous number of these  
220 expansin-containing bacteria are among the most economically costly agricultural plant  
221 pathogens (Table 2). Notably, all expansin-containing bacterial phytopathogens move  
222 systemically via xylem at some stage of pathogenesis – an unusual, highly virulent phenotype  
223 compared to localized lesions produced by most bacterial plant pathogens (75-82).

224 An additional 7% (22 out of 301) of bacterial species with expansins are marine or  
225 freshwater, and likely interact commensally with live algae or plant, or saprophytically degrade  
226 dead algal or plant matter. Several species of bacteria with expansin genes were isolated from  
227 plants growing in tidal flats, where they may facilitate plant-microbe symbiosis that allow both  
228 partners to better tolerate elevated salt levels (83). Expansins were also found from bacteria in  
229 acid mine drainage sites, sulfur mats and hot springs (84, 85). An expansin gene is present in

230 *Cedecea neteri*, which has been isolated as both a plant commensal and a facultative termite gut  
231 symbiont (86-89). Expansin genes are found in bacteria (*Paenibacillus*, *Ruminococcus*,  
232 *Firmicutes*, *Actinobacteria*) and fungi (*Neocallimastix*, *Anaeromyces*, *Piromyces*, *Aspergillus*)  
233 that are commensals in herbivore ruminant guts and likely aid in degradation of ingested plant  
234 matter (Supplemental Table 4) (90).

235         Only 31.5% of microbes (155 out of 491) with an expansin homolog are fungi, and they  
236 inhabit a more restricted range of ecological habitats than bacteria. Almost all fungal species  
237 with expansin genes (94%; 146 out of 155) are described as plant pathogens, commensals, or  
238 saprophytes, although it is possible this reflects under-sampling of fungi compared to bacteria  
239 (91). A higher proportion of fungal species with expansins are phytopathogenic (52.3%; 81 out  
240 of 155) compared to the proportion of bacteria that are phytopathogens (15%; 46 out of 301).  
241 Expansin genes are present in many economically devastating fungal pathogens, including many  
242 that can cause vascular wilt diseases and can move via xylem during pathogenesis (Figure 2,  
243 Table 2, Supplemental Table 4) (92, 93).

244

#### 245 *Horizontal gene transfer has shaped expansin distribution in microbes*

246         Horizontal transfer of genes between distantly related organisms can introduce new traits  
247 and drive rapid evolutionary innovation in the recipient organism. In the microbial expansin  
248 phylogeny we identified 21 nodes that are in strong conflict with expected taxonomic  
249 relationships, which is suggestive of horizontal gene transfer. We then evaluated the statistical  
250 support for the relationships at these nodes with three phylogenetic analyses (Figure 3, Table 3).  
251 Some of these nodes are well-supported statistically, while others have low support in one or  
252 more tests, and verifying their placement will require better sampling and/or improved

253 phylogenetic algorithms (Table 3).

254 Four nodes represent putative intra-domain HGT events within Eukaryota (nodes 16, 17,  
255 18, 19), twelve nodes represent putative intra-domain exchanges within Bacteria (nodes 1, 2, 3,  
256 4, 5, 6, 7, 8, 9, 10, 11, 21), and five nodes represent putative inter-domain exchanges between  
257 Bacteria and Eukaryota (nodes 12, 13, 14, 15, 20). Within Eukaryota, the Rhodophyta red alga  
258 *Gracilariopsis andersonii* is recovered within Stramenopiles (node 19). Thirteen Ascomycota are  
259 recovered in a mixed group with Viridiplantae, the Amoebozoa *Acanthamoeba castellanii* and  
260 the Stramenopile *Thalassiosira oceanica* (nodes 16, 17, 18).

261 Of the 12 within-bacteria HGT events, five involve  $\beta$ -proteobacteria (nodes 1, 5, 7, 11,  
262 21) and four involve  $\gamma$ -proteobacteria (nodes, 1, 2, 3, 8, 11). Two distinct groups of pathogenic  $\gamma$ -  
263 proteobacteria – the Xanthomonad and Enterobacterial plant pathogens – group with Firmicutes  
264 (nodes 2, 3). Similarities in ecological habitat and life histories between species at some nodes  
265 with putative HGT relationships – such as the marine  $\gamma$ -proteobacteria *Zooshikella ganghwensis*  
266 and marine Cyanobacteria at node 8, and plant pathogenic *Ralstonia* within plant pathogenic  
267 Xanthomonads at node 1 – suggest ecological niche may be a strong factor driving some  
268 expansin HGT events (94). Actinobacterial expansins separate into two main lineages, one  
269 comprised mainly of *Streptomyces* and the other mainly of *Micromonospora* and *Nocardia*.  
270 These Actinobacterial lineages are separated by a polyphyletic group that includes  $\beta$ -  
271 proteobacteria,  $\gamma$ -proteobacteria and Bacteroidetes (nodes 9, 10, 11). The plant commensal  
272 *Acidovorax radidis* is part of the  $\beta$ -proteobacteria group recovered within Myxobacteria (node 7),  
273 while five other *Acidovorax* that are plant pathogens are in the  $\beta$ -proteobacteria group recovered  
274 in Actinobacteria (node 11). All Chloroflexi are recovered within Myxobacteria (nodes 4, 6).

275 Five of the 21 putative HGT events are inter-domain exchanges between Bacteria and

276 Eukaryota. Node 15 recovers the expansin gene from *Haloferula* sp. (Verrucomicrobia), a marine  
277 symbiont of brown algae (Stramenopiles), near Amoebozoa and Stramenopiles (95). Node 12  
278 groups Chytrid fungi as sister to Actinobacteria, and places the Chytrid expansins as basal to the  
279 bacterial expansins. The Alveolate *Vitrella brassicaformis* (node 14) is recovered as sister to an  
280 Actinobacteria-Myxobacteria intra-domain HGT event (node 13). Node 20 groups the expansin  
281 genes from two Actinobacteria (*Hamadaea tsuongensis* and *Streptomyces acidiscabies*) and a  $\beta$ -  
282 proteobacteria (*Uliginosibacterium gangwonense*) (node 21) with Stramenopiles. In previous  
283 studies, the *Streptomyces acidiscabies* expansin gene was recovered within a group of plant  
284 expansins, and this relationship was interpreted as phylogenetic evidence for an interdomain  
285 HGT from a green land plant donor to a bacterium (33). In our phylogeny – built with a much  
286 broader representation of Amoebozoa and Stramenopiles than was available previously – this  
287 same *S. acidiscabies* expansin gene, plus an additional expansin gene from the actinobacterium  
288 *Hamadaea tsuonensis* – are still an example of interdomain HGT, but group with Stramenopiles  
289 and not within land plants. None of the 491 microbial expansin genes group within the  
290 Viridiplantae, strengthening the hypothesis that land plants were not the expansin gene donors to  
291 bacteria and fungi. Further, these five inter-domain HGT events (nodes 12, 13, 14, 15, 20)  
292 support the hypothesis that a bacterium could have acquired an expansin gene in a marine  
293 environment long before land plants evolved ~475-515 million years ago (96).

294

295 *Some microbial expansins co-occur with carbohydrate active proteins*

296 In some fungi and bacteria, the two-domain canonical expansin gene is fused to  
297 additional glycoside hydrolase (GH) and/or carbohydrate binding module (CBMs). There are  
298 currently 83 recognized CBM families. All are non-enzymatic, and often function as part of a

299 larger protein to facilitate adhesion to complex carbohydrates with high substrate specificity (24,  
300 97). GHs are a group of enzymes widespread among plants and microbes that degrade complex  
301 carbohydrates, and are currently classified into 153 distinct families in the Carbohydrate Active  
302 Enzymes database ([www.cazy.org](http://www.cazy.org)). Out of 491 microbial species with expansin genes, 49 (9.9%)  
303 exist as fusions to a carbohydrate active domain (Figure 4, Supplemental Table 5). Fifteen of  
304 these fusions were previously known (33), and 34 are first identified here.

305 Carbohydrate binding module family 1 (CBM1) is the only carbohydrate active domain  
306 fused to fungal expansins (alternatively referred to in the literature as a ‘swollenins’ (32, 40, 55)).  
307 All 14 fungal species with expansin-CBM1 fusions are non-pathogenic. Twelve species of non-  
308 pathogenic *Trichoderma*, *Penicillium* and *Talaromyces* form a group distinct from the other  
309 predominantly pathogenic fungi without CBM1 fusions, and this group is a well-supported  
310 within-Eukaryota HGT event (Figure 3, node 17). Some *Trichoderma* spp., including those with  
311 expansin-CBM1 fusions, are among the most thoroughly characterized plant beneficial fungi (98,  
312 99). We hypothesize that in fungal genetic backgrounds, expansin fusion to CBM1 increases  
313 fungal mutualistic capabilities to plant hosts, providing a selective advantage for fungal strains  
314 that contain this fusion.

315 In bacteria, expansins are predominantly found fused to domains from carbohydrate  
316 binding module family 2 (CBM2) and/or glycoside hydrolase family 5 (GH5). The Chloroflexi  
317 *Herpetosiphon aurantiacus* is the only microbe with an expansin fused to a CBM32 domain. A  
318 GH5-expansin fusion construct is present in 15 plant pathogenic Xanthomonadaceae. In some  
319 Cyanobacteria,  $\beta$ -proteobacteria,  $\gamma$ -proteobacteria and Actinobacteria, expansins are fused to  
320 CBM2 with variable domain arrangements (expansin-CBM2, CBM2-CBM2-expansin or CBM2-  
321 expansin). *Clavibacter michiganensis* is the only species with an expansin domain fused to both

322 GH5 and CBM2 domains (GH5-CBM2-expansin domain arrangement). Most bacteria with  
323 unfused expansin genes are not plant pathogens (Figure 2, Supplemental Table 4). However, of  
324 the bacterial species with expansin fusions to GH5 and/or CBM2 domains, most (65.3%; 32 out  
325 of 49) are virulent phytopathogens (Supplemental Table 5). This suggests that in bacteria,  
326 expansin fusions are more likely than unfused expansins to function as a virulence factor.

327         The existence of variable fusion constructs (expansin-CBM32, GH5-expansin, expansin-  
328 CBM2, CBM2-expansin, CBM2-CBM2-expansin, and GH5-CBM2-expansin) indicates multiple  
329 independent origins of expansin fusions to carbohydrate active domains have occurred in  
330 bacteria and fungi. The repeated independent fusions of CBM2 and GH5 domains in bacteria,  
331 and only CBM1 in fungi – out of hundreds of CBM and GH families – suggests that CBM1,  
332 CBM2 and GH5 active domains in combination with expansin are uniquely useful for bacterial  
333 and fungal interactions with cellulosic cell walls.

334         The enterobacteria may offer mechanistic insight into how fusions can occur. In all  
335 enterobacteria, expansin genes are unfused to carbohydrate active domains. However, the plant  
336 pathogens *Erwinia tracheiphila* (80, 100) and *Pantoea stewartii* have a canonical expansin gene  
337 directly adjacent to – but in a separate open reading frame (ORF) – from a GH5 endoglucanase  
338 gene. This expansin-GH5 domain arrangement in *E. tracheiphila* and *P. stewartii* is in opposite  
339 positional order to the 15 Xanthomonadaceae with a GH5-expansin fusion construct, suggesting  
340 that in either *E. tracheiphila* or *P. stewartii* this gene architecture arose *de novo* and was not  
341 acquired horizontally from a Xanthomonadaceae donor. In *E. tracheiphila* and *P. stewartii*, both  
342 the expansin and GH5 ORFs have a predicted secretion signal peptide. The two coding  
343 sequences are separated by a stop codon and a short stretch of 40 nucleotides in *E. tracheiphila*  
344 and 51 in *P. stewartii* (KE136322.1, position 16101-17807 in *E. tracheiphila* (101) and

345 NZ\_CP017589.1, position 1851-3562 in *P. stewartii*). From this genetic architecture, it is  
346 possible that either a small deletion in the region between these ORFs, or a mutation in the stop  
347 codon separating them, could result in fusion of the two domains into a single gene (102).

348

## 349 **Discussion**

350 We find that microbial expansin genes are more broadly distributed across diverse  
351 lineages of bacteria, fungi and other eukaryotic microbes than previously recognized. Especially  
352 notable is the presence of expansins in microbes inhabiting a previously unrecognized diversity  
353 of terrestrial and aquatic ecological niches, including those not traditionally thought of as  
354 cellulose-dominated. Many expansin genes are also found in microbes not yet known to interact  
355 with plants or algae, suggesting interactions with live or dead plant or algal matter is an  
356 overlooked yet important part of their ecological life histories. Identifying expansin genes in  
357 such a phylogenetically and ecologically diverse set of microbial species – including many  
358 which have not yet been described as interacting with plants or algae – suggests that the immense  
359 amount of global cellulose biomass (1) is an under-recognized selective pressure driving  
360 microbial evolution (94).

361 While the first organism to evolve an expansin gene and the timeframe of this innovation  
362 remains unknown, we hypothesize that the original expansin evolved long before the emergence  
363 of land plants 475-515 million years ago (96). Many microbes that use expansin proteins for cell  
364 wall expansion during growth and development – including Stramenopiles, Amoebozoa,  
365 Haptophyta, Alveolata, Rhodophyta and Chlorophyta – are lineages much older than land plants.  
366 The presence of expansin genes in all eukaryotic organisms with cellulosic cell walls, together  
367 with the absence of any extant alternate mechanism for irreversible cellulosic cell wall extension



368 suggests that expansins may have been necessary for the success of the original organism with  
369 cellulosic cell walls (30, 96, 103, 104). This also raises the possibility that the EXLX microbial  
370 expansin subfamily could have been the first to evolve, and then diversified into distinct EXPA,  
371 EXPB, EXLA, and EXLB subfamilies in land plants. Ultimately, answering the question of  
372 expansin origin and ancient evolutionary dynamics will require greater taxon sampling, high  
373 confidence molecular dating of the different lineages with this gene, and accurate rooting of the  
374 expansin phylogeny.

375         The microbial expansin phylogeny indicates that HGT has been an important process  
376 shaping the distribution of expansins among microorganisms, and that expansin gene exchange is  
377 ongoing. In some cases, the presence of expansin genes in most sequenced species within a  
378 group (such as Myxobacteria, Xanthomonadaceae, and the *Pectobacterium* and *Dickeya* group of  
379 Entobacterial plant pathogens) suggests that original acquisition of an expansin likely occurred in  
380 a common ancestor of these taxa before these groups diversified (105). In other species – notably  
381 several plant pathogens – acquisition of an expansin likely occurred on more recent ecological  
382 time scales. In several bacterial pathogen species, acquisition of an expansin gene or gene fusion  
383 resulted in an ability to move systemically via xylem and achieve high within-host titre, which is  
384 a high virulence phenotype (51, 52, 77, 106-108). The high frequency of expansin genes in many  
385 virulent fungal and bacterial plant pathogens suggests that expansins or expansin fusions can  
386 function as a potent virulence factor when acquired by bacteria and fungi in simplified agro-  
387 ecosystems. The increase in virulence conferred by horizontal acquisition of expansins or  
388 expansin fusions by microbes in agricultural systems may amount to yet another demonstration  
389 of human-driven evolution of pathogenic micro-organisms (80, 109-111). The amenability of  
390 expansin genes to horizontal transfer between phylogenetically divergent microbial lineages, the

391 functionality of this gene in diverse genetic backgrounds, and its repeated occurrence in virulent  
392 agricultural pathogens should elicit concern about the possibility of this gene facilitating the  
393 emergence of novel, highly virulent pathogen species or strains in managed agricultural settings.

394 In addition to expansin dissemination via HGT, functional evolution of microbial  
395 expansins is likely also driven by fusions with carbohydrate active proteins. There is a  
396 correlation between fusion to carbohydrate active domains with a transition between  
397 pathogenicity and commensalism, but in opposite directions for bacteria and fungi. In fungi,  
398 there was likely only one fusion of an expansin to a CBM1 domain. In bacteria, expansin genes  
399 have likely fused multiple times independently with a CBM2 domain, fused at least once to a  
400 GH5 domain in Xanthomonadaceae, and appears to be in a possible intermediate arrangement  
401 that may result in an additional fusion in *Erwinia tracheiphila* and/or *Pantoea stewartii*. The  
402 occurrence of expansin fusion constructs across the expansin phylogeny, repeated occurrence of  
403 fusions with the same carbohydrate active domains from multiple independent fusion events and  
404 the distinct ecological interactions of species with expansin fusions compared to closely related  
405 species with unfused expansin genes suggests that these fusion constructs have emergent (but  
406 still unknown) properties beyond their individual constituent domains.

407 We now recognize that all Eukaryotic microbes and macrobes in marine environments –  
408 and later in evolutionary history, on land – have evolved as part of complex multi-species  
409 communities (112-115). A mechanism to non-destructively manipulate structural cell wall  
410 cellulose would have been highly adaptive for the organism that first evolved a cellulosic cell  
411 wall. This same mechanism could have also been adaptive for the diverse microbes that colonize  
412 the surfaces of eukaryotes that have cellulosic cell walls as hosts. The functional flexibility of  
413 expansins – which are essential for normal growth and development in some lineages (land

414 plants, red and green algae and some eukaryotic microbes) and accessory in others (bacteria,  
415 fungi and possibly other eukaryotic microbes) – appears unique. A more complete understanding  
416 of expansin evolutionary origin, functional diversification and emergent properties from fusions  
417 with carbohydrate active domains may offer unique insight into the origin of cellulosic cell walls,  
418 and mechanisms underlying host-microbe ecological interactions.

419

## 420 **Methods**

### 421 *Plant and microbial expansin protein structures*

422 The crystal structures of the bacterial expansin from *Bacillus subtilis* (BsEXLX1, PDB: 3D30)  
423 alone (116) and in complex with plant cellobiose (PDB: 4FER)(117), and the plant  $\beta$ -expansin  
424 ZmEXPB1 (PDB: 2HCZ) from *Zea mays* (118) were downloaded from the Protein Data Bank  
425 (PDB) (119). The 3D protein structures were visualized with UCSF Chimera (v1.2.2) (120).

426

### 427 *Detection of microbial expansin sequences:*

428 Amino acid sequences encoding microbial expansins were identified in a two-step approach. In  
429 the first step, the NCBI non-redundant protein sequence database was queried using the  
430 keywords ‘expansin’ and ‘swollenin’ and excluding hits from Viridiplantae taxa (accessed Jan.  
431 2017). The retrieved amino acid sequences were then curated to remove duplicates and ensure  
432 that all hits were *bona fide* microbial expansin genes. All hits were evaluated based on presence  
433 of the canonical expansin domains and key amino acid motifs (conserved aspartic acid in domain  
434 1 and conserved aromatic triplet in domain 2) to the experimentally validated reference expansin  
435 sequences BsEXLX1 from *Bacillus subtilis* (AAB84448.1), and the alpha expansin AtEXPA4  
436 from *Arabidopsis* (AEC09708.1). BsEXLX1 and AtEXPA4 were used as references because they

437 represent the microbial expansin (BsEXLX1) or plant expansin (AtEXPA4) superfamilies, and  
438 the expansin function of both genes has been experimentally validated.

439         Records were removed from the dataset if the amino acid sequence lacked either of the  
440 characteristic expansin domains or key residues. Amino acids sequences that flanked the two  
441 canonical expansin domains that were included in the CDS record because of mis-annotation  
442 (such as RNA polymerase sequences) were trimmed so that only the canonical expansin domains  
443 (and carbohydrate associated domains, when present) were retained. Domains were annotated  
444 and identified using CD-Search from NCBI (30).

445 The expansin sequences retrieved in this initial, keyword-based search were then manually  
446 separated into bacteria, fungi, or microbial eukaryotic subsets. Representative sequences from  
447 these three taxonomic groups were then used as BLASTP queries to identify any microbial  
448 expansin gene sequences in the NCBI non-redundant (*nr*) database that may have been missed in  
449 the keyword search. The bacterial, fungal and eukaryotic microbe expansin sequences were used  
450 as BLASTP queries against the non-redundant *nr* protein database using default parameters, but  
451 excluding hits from Viridiplantae (121). This sequence-based approach yielded additional hits  
452 that were added to the existing sequence lists. The sequences were again aligned to the reference  
453 expansin sequences using MAFFT, and then manually filtered and trimmed to remove false  
454 positive hits and mis-annotated flanking regions. The final microbial expansin gene set contains  
455 600 unique, *bona-fide* non-Viridiplantae expansin proteins from 491 distinct microbial species  
456 (Supplemental File 1). For 113 microbial species, there were at least two, and up to eight, non-  
457 identical expansin genes within the same species (Supplemental Table 1). All sequence  
458 alignments were performed using MAFFT (v. 7) with the options FFT-NS-i (122).

459         Taxonomy information was retrieved for all 491 microbial species. The presence of

460 expansin genes was mapped onto the currently understood phylogenies for Eukaryota and  
461 Bacteria (59, 123-125). For each bacterial order with multiple species that contain expansin  
462 genes, the NCBI taxonomy database was used to determine the total number of named species  
463 and the total number of sequenced species (125).

464

#### 465 Phylogenetic tree reconstruction

466 Because of high amino acid divergence, the expansin homologs from bacteria, fungi and  
467 the other eukaryotic microbes were aligned separately using MAFFT (option E-INS-i) (126).  
468 Poorly aligned regions at the termini were manually trimmed to the point where a conserved  
469 block was shared across 90% of species. All three trimmed alignments were then combined, and  
470 aligned again with MAFFT (option E-INS-i). Viridiplantae expansin gene sequences from one  
471 dicot (AtEXPA4, GenBank: O48818.1), one monocot (ZmEXPB1, GenBank: P58738.2), one  
472 non-vascular plant (PpEXPA10, XP\_024392378.1), four randomly chosen sequences from the  
473 charophyte green algae *Klebsormidium nitens* (GAQ91800.1, GAQ85527.1, GAQ79710.1,  
474 GAQ91109.1) and two sequences from the chlorophyte green algae *Chlorella variabilis*  
475 (XP\_005846210.1, XP\_005846208.1) were added to the dataset. The dataset was re-aligned a  
476 final time with MAFFT (option E-INS-i). The final sequence alignment contains 608 sequences  
477 and 689 amino acid sites (Supplemental File 1).

478 ModelFinder (as implemented within IQ-tree v. 1.6) was used to determine the best  
479 evolutionary model for the alignment (127). The WAG+R7 model was chosen as the best  
480 evolutionary model based on the Akaike information criterion (AIC). The phylogeny was  
481 reconstructed in IQ-tree (v. 1.6) (128), using a smaller perturbation strength and larger number of  
482 stop iterations (options -pers 0.2 -nstop 500) to avoid local minima (all other parameters default).

483 Node supports were estimated using the Shimodaira–Hasegawa like approximate likelihood ratio  
484 test (SH-aLRT) (129) and the ultrafast bootstrap with 1000 bootstrap pseudo-replicates (130).  
485 IQ-tree was run with these parameters 13 independent times to test the robustness of  
486 phylogenetic relationships. The resulting consensus tree of the 13 runs was manually rooted  
487 between prokaryotes and eukaryotes for presentation purposes (Supplemental File 2). The tree  
488 was visualized and annotated using the ggtree package in R (v. 3.4.2) (131).

489

#### 490 *Inference of expansin horizontal gene transfer events*

491 Twenty-one putative horizontal gene transfer events were identified by finding incongruences  
492 between the expansin gene tree (Supplemental Figure 2) and the species taxonomy. To further  
493 evaluate the strength of the relationships recovered at these 21 nodes, a Bayesian approach was  
494 used to reconstruct the microbial expansin gene tree. This was followed by pruning 259 taxa  
495 from the dataset, leaving 350 taxa in the reduced alignment (Supplemental File 3, Supplemental  
496 File 4), and rerunning a maximum likelihood analysis on the reduced dataset in IQ-tree with the  
497 same options and run parameters as the full tree (described above) (127). Using ModelFinder  
498 implemented within IQ-tree v. 1.6 (127), the WAG+G4 model was selected for the pruned  
499 alignment. For the Bayesian phylogeny, the expansins from *Vitrella brassicaformis* and  
500 *Emiliania huxleyi* were removed due to their extremely divergent sequences which may have  
501 interfered with convergence of the Bayesian model. MrBayes (v 3.2.6) (132) was then used to  
502 construct a Bayesian tree on the XSEDE cluster (133). Two independent runs were performed for  
503 10 million generations, each with six chains using metropolis coupling with a heating parameter  
504 of 0.005 and swap frequency of 1. Each chain was sampled every 500 generations and the first  
505 1.5 million samples were discarded as burn-in. The log likelihood of both runs plateaued after

506 ~1.5 million generations (Supplemental Figure 6) and both runs converged on a similar tree  
507 (standard deviation of split frequencies between runs = 0.020738. All parameters of the MCMC  
508 algorithm are listed in Supplemental File 5. Because both runs converged on a similar tree, a  
509 majority rule consensus tree was constructed from the sampled trees of run 1 (Supplemental File  
510 6).

511

512 *Ecological niche determination and phylogenetic tree annotation*

513 For each microbial species with an expansin gene, a literature search was carried out to  
514 determine the known ecological associations (Supplemental Table 4). For many species, there  
515 was little or no documentation of the life history. Further, for many species, the existing  
516 descriptions of ecological life history may be incomplete. For example, we recognize that the  
517 classifications of ‘plant commensal’, ‘saprophyte’, and ‘soil dweller’ likely share significant  
518 functional overlap, and many microbes may fit multiple of these overlapping categories. Many  
519 microbes thought of (and researched) as ‘soil dwellers’ are likely also saprophytes, plant  
520 commensals, and/or plant pathogens depending on the environmental conditions (92, 93, 134,  
521 135). Despite these caveats, each species was assigned to only one of the following ecological  
522 categories after evaluating the available ecological information: freshwater, marine, gut microbe,  
523 soil dweller, plant commensal, plant pathogen, saprophyte, hot spring, sulfur mat, or wastewater.  
524 The certainty (or lack thereof) for the ecological assignments for each species is also noted in  
525 Supplemental Table 4. The expansin microbial phylogeny was annotated with the collected  
526 ecological information in Supplemental Table 4 using the ggtree package in R (v. 3.4.2) (136).

527

528 *Identification of carbohydrate active domains fused to microbial expansin domains*

529 A comprehensive list of microbial expansin genes fused to carbohydrate active domains was  
530 compiled by a search of the *nr* database (121) with the keywords ‘expansin’ and ‘swollenin’. This  
531 was followed by a BLASTP search with the expansin-swollenin fusion from *Trichoderma reesei*  
532 (Accession number: CAB92328.1) as a query. Both searches were constrained to records with a  
533 bit score above 100 and more than 300 amino acid residues in length to exclude non-fused  
534 expansin genes, which are normally ~200-250 amino acids in length. The matches that met these  
535 two criteria were retained as putative genes with expansin-carbohydrate fusions.  
536 The presence of a carbohydrate active domain(s) was then evaluated with a batch CD-search  
537 (137) and dbSCAN search which identified any carbohydrate active domains (138). Records that  
538 shared more than 95% sequence identity to another record in the same species were considered  
539 redundant and were removed. The expansin domains were then aligned in MAFFT with the plant  
540 (AtEXPA4) and bacteria (BsEXLX1) reference expansin sequences (126). The expansin -  
541 carbohydrate active domain fusion constructs were plotted next to the expansin gene tree using  
542 ggtree and genoPlotR (139).

543  
544 **Acknowledgements**

545 OZ was supported in part by a Simons Foundation Young Investigator Award. JR was supported  
546 by Fundación Mexico en Harvard and Conacyt grant 237414; LRS was supported by NSF  
547 postdoctoral fellowship DBI-1202736. This project used the Extreme Science and Engineering  
548 Discovery Environment (XSEDE), which is supported by National Science Foundation grant  
549 number ACI-1548562. We thank Kerry E. Mauck and Rob Dunn for critical reading and  
550 constructive comments on the manuscript.

551  
552 **Figure Legends**



553

554 **Figure 1. Distribution of expansins within major groups of the Tree of Life.** The lineages  
555 within Eukaryota and Bacteria that have at least one species with an expansin gene are shown in  
556 black, and the lineages without a species with an expansin gene are in gray. No expansin  
557 homologs were detected in the available Archaeal genomes. Lineages with organisms that use  
558 cellulose structurally are marked with a green dot. The phyla relationships are based on (59, 123,  
559 140) for Eukaryota and (124) for Bacteria.

560

561 **Figure 2. Ecological niches occupied by microbes with expansins.** The maximum likelihood  
562 phylogenetic tree should be considered unrooted. Each branch is color-coded according to the  
563 ecological life history of that taxon (Supplementary Table 4). The major taxonomic groups of the  
564 tree are annotated with black bars. A proportional bar chart summarizing the distribution of  
565 ecological life histories is shown to the right of the major taxonomic groups. The scale bar,  
566 amino acid substitutions per site. See Supplemental Figure 2 for the tree with the individual taxa  
567 labels shown.

568

569 **Figure 3. Evidence for horizontal exchange of expansin genes within and between Bacteria**  
570 **and Eukaryota.** The maximum likelihood phylogenetic tree should be considered unrooted.  
571 Some groups are collapsed to improve presentation; these groups are marked with the number of  
572 taxa collapsed at that tip. Well-supported nodes (Shimodaira–Hasegawa like approximate  
573 likelihood ratio test > 70% and/or ultrafast bootstrap > 95%) are marked with black dots.  
574 Branches are colored according to taxonomic classification. Nodes inferred to be involved in the

575 HGT events are shown in bold and numbered (1-21), which correspond to their entries in Table  
576 3. Tree scale bar, number of amino acid substitutions per site for the expansin tree.

577

578 **Figure 4. Gene architecture and phylogenetic distribution of expansin genes that are fused**  
579 **with carbohydrate active domains.** Maximum likelihood phylogenetic tree of microbial  
580 expansin sequences should be considered unrooted. The tree branches are colored according to  
581 taxonomy. The tree scale bar is the number of amino acid substitutions per site. In 49 species  
582 where the expansin is fused to a carbohydrate active domain, the domain architectures are shown  
583 next to the taxa that have them. The domain architecture diagrams are drawn to scale, with the  
584 black line representing the length of the full nucleotide sequences of each gene, and carbohydrate  
585 active domains as colored rectangles. The domain architecture scale bar is the length (in  
586 nucleotides) of the expansin and carbohydrate active domains.

587

588 **Table 1. Distribution of microbial expansins in major taxonomic groups.**

589

590 **Table 2. Presence of expansin genes in the ‘Top 10’ most important species of plant**  
591 **pathogenic bacteria and fungi in a poll of plant pathologists by the journal *Molecular Plant***  
592 ***Pathology* (78, 141).**

593

594 **Table 3. Maximum likelihood and Bayesian support values testing statistical strength at 21**  
595 **nodes representing putative HGT events.**

596

597 **Supplemental Figure Legends**

598

599 **Supplemental figure 1. Expansin protein structure.** (A) Surface of the bacterial expansin  
600 BsEXLX1 (PDB ID: 3D30). (B) Surface of the plant expansin ZmEXPB1 (PDB ID: 2HCZ). (C)  
601 Ribbon representation of the bacterial expansin BsEXLX1 in complex with cellohexaose (PDB  
602 ID: 4FER). On all panels, domains 1 and 2 are shown in dark grey and white, respectively;  
603 residues crucial for binding cellulose are colored in blue, while residues important for loosening  
604 of a cell wall are colored in yellow. On panel C, cellohexaose is shown in magenta.

605

606 **Supplemental figure 2. Phylogenetic relationship among all 600 microbial expansins**  
607 **inferred using maximum likelihood method.** The tree should be considered unrooted. Each  
608 branch is color-coded according to the taxonomic affiliation of the organism. Well-supported  
609 nodes of the tree (Shimodaira–Hasegawa like approximate likelihood ratio test > 70% or ultrafast  
610 bootstrap > 95%) are marked with black dots. The nodes where relationships conflict with  
611 expected taxonomic relationships are numbered as in Figure 3 and Table 3. The scale bar, amino  
612 acid substitutions per site.

613

614 **Supplemental figure 3. Phylogenetic relationships among the detected microbial expansins**  
615 **inferred using Bayesian approach.** The tree is the majority rule consensus of the trees obtained  
616 via Bayesian inference. Numbers at the nodes represent posterior probabilities of the nodes. The  
617 tree should be considered unrooted. Each branch is color-coded according to the taxonomic  
618 affiliation of an organism. The scale bar, amino acid substitutions per site.

619

620 **Supplemental figure 4. Phylogenetic relationships among the 350 selected microbial**  
621 **expansins inferred using maximum likelihood method.** The tree should be considered  
622 unrooted. Each branch is color-coded according to the taxonomic affiliation of an organism.  
623 Support values for each node are from Shimodaira–Hasegawa like approximate likelihood ratio  
624 test and ultrafast bootstrap analysis. The scale bar, amino acid substitutions per site.

625

626 **Supplemental figure 5: NCBI Common Tree representation of the species tree for all 491**  
627 **microbial species with expansin genes**

628

629 **Supplemental figure 6. Trace plot of two independent runs of Bayesian inference.** Two runs  
630 reached stationary phase after ~1.5 million generations.

631

632 **Supplemental table 1: List of microbial species with multiple expansin genes per genome.**

633

634 **Supplemental table 2. Number of publicly available genomes in the eukaryotic groups**  
635 **depicted in Figure 1.**

636

637 **Supplemental table 3. Animals whose genomes are known to contain at least one expansin**  
638 **gene.**

639

640 **Supplemental table 4. Ecological metadata for each microbial species with an expansin**  
641 **gene.**

642

643 **Supplemental table 5. Metadata for the 49 expansins that are fused with carbohydrate**

644 **active domains.**

645

646

647 **References**

- 648 1. Bar-On YM, Phillips R, Milo R. 2018. The biomass distribution on Earth. *Proceedings*  
649 *of the National Academy of Sciences*:201711842.
- 650 2. Cosgrove DJ. 2000. Loosening of plant cell walls by expansins. *Nature* 407:321-326.
- 651 3. Li Y, Jones L, McQueen-Mason S. 2003. Expansins and cell growth. *Current Opinion*  
652 *in Plant Biology* 6:603-610.
- 653 4. Cosgrove DJ. 2005. Growth of the plant cell wall. *Nature Reviews* 6:850-861.
- 654 5. Hématy K, Cherk C, Somerville S. 2009. Host–pathogen warfare at the plant cell wall.  
655 *Current Opinion in Plant Biology* 12:406-413.
- 656 6. Popper ZA, Michel G, Hervé C, Domozych DS, Willats WG, Tuohy MG, Kloareg B,  
657 Stengel DB. 2011. Evolution and diversity of plant cell walls: from algae to flowering  
658 plants. *Annual Review of Plant Biology* 62:567-90.
- 659 7. Popper ZA, Tuohy MG. 2010. Beyond the green: understanding the evolutionary  
660 puzzle of plant and algal cell walls. *Plant Physiology* 153:373-383.
- 661 8. Darley CP, Li Y, Schaap P, McQueen-Mason SJ. 2003. Expression of a family of  
662 expansin - like proteins during the development of *Dictyostelium discoideum*. *FEBS*  
663 *Letters* 546:416-418.
- 664 9. Kimura S, Itoh T. 1995. Evidence for the role of the glomerulocyte in cellulose  
665 synthesis in the tunicate, *Metandrocarpa uedai*. *Protoplasma* 186:24-33.
- 666 10. Tamai N, Tatsumi D, Matsumoto T. 2004. Rheological properties and molecular  
667 structure of tunicate cellulose in LiCl/1, 3-dimethyl-2-imidazolidinone.  
668 *Biomacromolecules* 5:422-432.
- 669 11. Nakashima K, Yamada L, Satou Y, Azuma J-i, Satoh N. 2004. The evolutionary origin  
670 of animal cellulose synthase. *Development Genes and Evolution* 214:81-88.
- 671 12. Cho H-T, Cosgrove DJ. 2000. Altered expression of expansin modulates leaf growth  
672 and pedicel abscission in *Arabidopsis thaliana*. *Proceedings of the National Academy*  
673 *of Sciences* 97:9783-9788.
- 674 13. Pien S, Wyrzykowska J, McQueen-Mason S, Smart C, Fleming A. 2001. Local  
675 expression of expansin induces the entire process of leaf development and modifies  
676 leaf shape. *Proceedings of the National Academy of Sciences* 98:11812-11817.
- 677 14. Lee D-K, Ahn JH, Song S-K, Do Choi Y, Lee JS. 2003. Expression of an expansin gene is  
678 correlated with root elongation in soybean. *Plant Physiology* 131:985-997.
- 679 15. Gray-Mitsumune M, Mellerowicz EJ, Abe H, Schrader J, Winzél A, Sterky F, Blomqvist  
680 K, McQueen-Mason S, Teeri TT, Sundberg B. 2004. Expansins abundant in secondary  
681 xylem belong to subgroup A of the  $\alpha$ -expansin gene family. *Plant Physiology*  
682 135:1552-1564.
- 683 16. Im K-H, Cosgrove DJ, Jones AM. 2000. Subcellular localization of expansin mRNA in  
684 xylem cells. *Plant Physiology* 123:463-470.

- 685 17. Brummell DA, Harpster MH, Civello PM, Palys JM, Bennett AB, Dunsmuir P. 1999.  
686 Modification of expansin protein abundance in tomato fruit alters softening and cell  
687 wall polymer metabolism during ripening. *The Plant Cell* 11:2203-2216.
- 688 18. Chen F, Bradford KJ. 2000. Expression of an expansin is associated with endosperm  
689 weakening during tomato seed germination. *Plant Physiology* 124:1265-1274.
- 690 19. Cosgrove DJ. 2016. Catalysts of plant cell wall loosening. *F1000Research* 5.
- 691 20. Ramakrishna P, Duarte PR, Rance GA, Schubert M, Vordermaier V, Dai Vu L, Murphy  
692 E, Barro AV, Swarup K, Moirangthem K. 2019. EXPANSIN A1-mediated radial  
693 swelling of pericycle cells positions anticlinal cell divisions during lateral root  
694 initiation. *Proceedings of the National Academy of Sciences*:201820882.
- 695 21. Yennawar NH, Li L-C, Dudzinski DM, Tabuchi A, Cosgrove DJ. 2006. Crystal structure  
696 and activities of EXPB1 (*Zea m 1*), a  $\beta$ -expansin and group-1 pollen allergen from  
697 maize. *Proceedings of the National Academy of Sciences* 103:14664-14671.
- 698 22. Kende H, Bradford K, Brummell D, Cho H-T, Cosgrove D, Fleming A, Gehring C, Lee Y,  
699 McQueen-Mason S, Rose J. 2004. Nomenclature for members of the expansin  
700 superfamily of genes and proteins. *Plant Molecular Biology* 55:311-314.
- 701 23. Kerff F, Amoroso A, Herman R, Sauvage E, Petrella S, Filée P, Charlier P, Joris B,  
702 Tabuchi A, Nikolaidis N, Cosgrove DJ. 2008. Crystal structure and activity of *Bacillus*  
703 *subtilis* Yoaj (EXLX1), a bacterial expansin that promotes root colonization.  
704 *Proceedings of the National Academy of Sciences* 105:16876-16881.
- 705 24. Lombard V, Golaconda Ramulu H, Drula E, Coutinho PM, Henrissat B. 2013. The  
706 carbohydrate-active enzymes database (CAZy) in 2013. *Nucleic Acids Research*  
707 42:D490-D495.
- 708 25. Sampedro J, Cosgrove DJ. 2005. The expansin superfamily. *Genome biology* 6:242.
- 709 26. Li Y, Darley CP, Ongaro V, Fleming A, Schipper O, Baldauf SL, McQueen-Mason SJ.  
710 2002. Plant expansins are a complex multigene family with an ancient evolutionary  
711 origin. *Plant Physiology* 128:854-864.
- 712 27. Ding A, Marowa P, Kong Y. 2016. Genome-wide identification of the expansin gene  
713 family in tobacco (*Nicotiana tabacum*). *Molecular Genetics and Genomics* 291:1891-  
714 1907.
- 715 28. Santiago TR, Pereira VM, de Souza WR, Steindorff AS, Cunha BA, Gaspar M, Fávaro  
716 LC, Formighieri EF, Kobayashi AK, Molinari HB. 2018. Genome-wide identification,  
717 characterization and expression profile analysis of expansins gene family in  
718 sugarcane (*Saccharum spp.*). *PloS One* 13:e0191081.
- 719 29. Lee Y, Choi D, Kende H. 2001. Expansins: ever-expanding numbers and functions.  
720 *Current Opinion in Plant Biology* 4:527-532.
- 721 30. Cosgrove DJ. 2015. Plant expansins: diversity and interactions with plant cell walls.  
722 *Current Opinion in Plant Biology* 25:162-172.
- 723 31. Wang T, Park YB, Caporini MA, Rosay M, Zhong L, Cosgrove DJ, Hong M. 2013.  
724 Sensitivity-enhanced solid-state NMR detection of expansin's target in plant cell  
725 walls. *Proceedings of the National Academy of Sciences*  
726 doi:10.1073/pnas.1316290110:201316290.
- 727 32. Cosgrove DJ. 2017. Microbial Expansins. *Annual Review of Microbiology* 71:479-  
728 497.

- 729 33. Nikolaidis N, Doran N, Cosgrove DJ. 2013. Plant expansins in bacteria and fungi:  
730 evolution by horizontal gene transfer and independent domain fusion. *Molecular*  
731 *Biology and Evolution* 31:376-386.
- 732 34. Carey RE, Hepler NK, Cosgrove DJ. 2013. *Selaginella moellendorffii* has a reduced and  
733 highly conserved expansin superfamily with genes more closely related to  
734 angiosperms than to bryophytes. *BMC Plant Biology* 13:4.
- 735 35. Schipper O, Schaefer D, Reski R, Fleming A. 2002. Expansins in the bryophyte  
736 *Physcomitrella patens*. *Plant Molecular Biology* 50:789-802.
- 737 36. Carey RE, Cosgrove DJ. 2007. Portrait of the expansin superfamily in *Physcomitrella*  
738 *patens*: comparisons with angiosperm expansins. *Annals of Botany* 99:1131-1141.
- 739 37. Nikolaidis N, Doran N, Cosgrove DJ. 2014. Plant expansins in bacteria and fungi:  
740 evolution by horizontal gene transfer and independent domain fusion. *Molecular*  
741 *biology and evolution* 31:376-386.
- 742 38. Georgelis N, Nikolaidis N, Cosgrove DJ. 2015. Bacterial expansins and related  
743 proteins from the world of microbes. *Applied Microbiology and Biotechnology*  
744 99:3807-3823.
- 745 39. Ogasawara S, Shimada N, Kawata T. 2009. Role of an expansin - like molecule in  
746 *Dictyostelium morphogenesis* and regulation of its gene expression by the signal  
747 transducer and activator of transcription protein Dd - STATa. *Development, Growth*  
748 *& Differentiation* 51:109-122.
- 749 40. Brotman Y, Briff E, Viterbo A, Chet I. 2008. Role of swollenin, an expansin-like  
750 protein from *Trichoderma*, in plant root colonization. *Plant Physiology* 147:779-789.
- 751 41. Branda SS, Vik Å, Friedman L, Kolter R. 2005. Biofilms: the matrix revisited. *Trends*  
752 *in microbiology* 13:20-26.
- 753 42. Schleifer KH, Kandler O. 1972. Peptidoglycan types of bacterial cell walls and their  
754 taxonomic implications. *Bacteriological Reviews* 36:407.
- 755 43. Burke C, Thomas T, Lewis M, Steinberg P, Kjelleberg S. 2011. Composition,  
756 uniqueness and variability of the epiphytic bacterial community of the green alga  
757 *Ulva australis*. *The ISME Journal* 5:590.
- 758 44. Egan S, Harder T, Burke C, Steinberg P, Kjelleberg S, Thomas T. 2013. The seaweed  
759 holobiont: understanding seaweed-bacteria interactions. *FEMS Microbiology*  
760 *Reviews* 37:462-476.
- 761 45. Haney CH, Samuel BS, Bush J, Ausubel FM. 2015. Associations with rhizosphere  
762 bacteria can confer an adaptive advantage to plants. *Nature Plants* 1.
- 763 46. Niu B, Paulson JN, Zheng X, Kolter R. 2017. Simplified and representative bacterial  
764 community of maize roots. *Proceedings of the National Academy of*  
765 *Sciences*:201616148.
- 766 47. Shabat SKB, Sasson G, Doron-Faigenboim A, Durman T, Yaacoby S, Miller MEB,  
767 White BA, Shterzer N, Mizrahi I. 2016. Specific microbiome-dependent mechanisms  
768 underlie the energy harvest efficiency of ruminants. *The ISME Journal* 10:2958.
- 769 48. Meibom KL, Li XB, Nielsen AT, Wu CY, Roseman S, Schoolnik GK. 2004. The *Vibrio*  
770 *cholerae* chitin utilization program. *Proceedings of the National Academy of*  
771 *Sciences* 101:2524.
- 772 49. Cosgrove DJ. 2017. Microbial Expansins. *Annual Review of Microbiology* 71.

- 773 50. Tancos MA, Lowe - Power TM, Peritore - Galve FC, Tran TM, Allen C, Smart CD.  
774 2017. Plant - like bacterial expansins play contrasting roles in two tomato vascular  
775 pathogens. *Molecular Plant Pathology*.
- 776 51. Jahr H, Dreier J, Meletzus D, Bahro R, Eichenlaub R. 2000. The endo- $\beta$ -1, 4-glucanase  
777 CelA of *Clavibacter michiganensis* subsp. *michiganensis* is a pathogenicity  
778 determinant required for induction of bacterial wilt of tomato. *Molecular Plant-  
779 Microbe Interactions* 13:703-714.
- 780 52. Olarte-Lozano M, Mendoza-Nuñez MA, Pastor N, Segovia L, Folch-Mallol J, Martínez-  
781 Anaya C. 2014. PcExl1 a novel acid expansin-like protein from the plant pathogen  
782 *Pectobacterium carotovorum*, binds cell walls differently to BsEXLX1. *PLoS One*  
783 9:e95638.
- 784 53. Laine MJ, Haapalainen M, Wahlroos T, Kankare K, Nissinen R, Kassuwi S, Metzler MC.  
785 2000. The cellulase encoded by the native plasmid of *Clavibacter michiganensis* ssp.  
786 *sepedonicus* plays a role in virulence and contains an expansin-like domain.  
787 *Physiological and Molecular Plant Pathology* 57:221-233.
- 788 54. Tancos MA, Lowe - Power TM, Peritore - Galve FC, Tran TM, Allen C, Smart CD.  
789 2018. Plant - like bacterial expansins play contrasting roles in two tomato vascular  
790 pathogens. *Molecular Plant Pathology* 19:1210-1221.
- 791 55. Saloheimo M, Paloheimo M, Hakola S, Pere J, Swanson B, Nyssönen E, Bhatia A,  
792 Ward M, Penttilä M. 2002. Swollenin, a *Trichoderma reesei* protein with sequence  
793 similarity to the plant expansins, exhibits disruption activity on cellulosic materials.  
794 *European Journal of Biochemistry* 269:4202-4211.
- 795 56. Hwang IS, Oh E-J, Lee HB, Oh C-S. 2018. Functional characterization of two cellulase  
796 genes in the Gram-positive pathogenic bacterium *Clavibacter michiganensis* for  
797 wilting in tomato. *Molecular Plant-Microbe Interactions*.
- 798 57. Junior AT, Dolce LG, de Oliveira Neto M, Polikarpov I. 2015. *Xanthomonas campestris*  
799 expansin-like X domain is a structurally disordered beta-sheet macromolecule  
800 capable of synergistically enhancing enzymatic efficiency of cellulose hydrolysis.  
801 *Biotechnology Letters* 37:2419-2426.
- 802 58. Price DC, Chan CX, Yoon HS, Yang EC, Qiu H, Weber AP, Schwacke R, Gross J, Blouin  
803 NA, Lane C. 2012. *Cyanophora paradoxa* genome elucidates origin of photosynthesis  
804 in algae and plants. *Science* 335:843-847.
- 805 59. Adl SM, Bass D, Lane CE, Lukeš J, Schoch CL, Smirnov A, Agatha S, Berney C, Brown  
806 MW, Burki F. 2019. Revisions to the classification, nomenclature, and diversity of  
807 eukaryotes. *Journal of Eukaryotic Microbiology* 66:4-119.
- 808 60. Sasakura Y, Ogura Y, Treen N, Yokomori R, Park S-J, Nakai K, Saiga H, Sakuma T,  
809 Yamamoto T, Fujiwara S. 2016. Transcriptional regulation of a horizontally  
810 transferred gene from bacterium to chordate. *Proceedings of the Royal Society B:  
811 Biological Sciences* 283:20161712.
- 812 61. Sasakura Y, Nakashima K, Awazu S, Matsuoka T, Nakayama A, Azuma J-i, Satoh N.  
813 2005. Transposon-mediated insertional mutagenesis revealed the functions of  
814 animal cellulose synthase in the ascidian *Ciona intestinalis*. *Proceedings of the  
815 National Academy of Sciences* 102:15134-15139.



- 816 62. Coutteau P, Sorgeloos P. 1992. The use of algal substitutes and the requirement for  
817 live algae in the hatchery and nursery rearing of bivalve molluscs: an international  
818 survey. *Journal of Shellfish Research*.
- 819 63. Sakamoto K, Touhata K, Yamashita M, Kasai A, Toyohara H. 2007. Cellulose digestion  
820 by common Japanese freshwater clam *Corbicula japonica*. *Fisheries Science* 73:675-  
821 683.
- 822 64. Danchin EG, Rosso M-N, Vieira P, de Almeida-Engler J, Coutinho PM, Henrissat B,  
823 Abad P. 2010. Multiple lateral gene transfers and duplications have promoted plant  
824 parasitism ability in nematodes. *Proceedings of the National Academy of Sciences*  
825 107:17651-17656.
- 826 65. Fawke S, Doumane M, Schornack S. 2015. Oomycete interactions with plants:  
827 infection strategies and resistance principles. *Microbiology and Molecular Biology*  
828 *Reviews* 79:263-280.
- 829 66. Kamoun S. 2001. Nonhost resistance to *Phytophthora*: novel prospects for a classical  
830 problem. *Current Opinion in Plant Biology* 4:295-300.
- 831 67. Hardham AR. 2007. Cell biology of plant-oomycete interactions. *Cellular*  
832 *Microbiology* 9:31-39.
- 833 68. Grenville-Briggs LJ, Anderson VL, Fugelstad J, Avrova AO, Bouzenezana J, Williams A,  
834 Wawra S, Whisson SC, Birch PR, Bulone V. 2008. Cellulose synthesis in *Phytophthora*  
835 *infestans* is required for normal appressorium formation and successful infection of  
836 potato. *The Plant Cell* 20:720-738.
- 837 69. Helbert W, Sugiyama J, Ishihara M, Yamanaka S. 1997. Characterization of native  
838 crystalline cellulose in the cell walls of Oomycota. *Journal of Biotechnology* 57:29-  
839 37.
- 840 70. Lofgren LA, LeBlanc NR, Certano AK, Nachtigall J, LaBine KM, Riddle J, Broz K, Dong  
841 Y, Bethan B, Kafer CW. 2018. *Fusarium graminearum*: pathogen or endophyte of  
842 North American grasses? *New Phytologist*.
- 843 71. Crespi BJ. 2001. The evolution of social behavior in microorganisms. *Trends in*  
844 *Ecology & Evolution* 16:178-183.
- 845 72. Neil RB, Hite D, Kelrick MI, Lockhart ML, Lee K. 2005. Myxobacterial biodiversity in  
846 an established oak-hickory forest and a savanna restoration site. *Current*  
847 *Microbiology* 50:88-95.
- 848 73. Loria R, Kers J, Joshi M. 2006. Evolution of plant pathogenicity in *Streptomyces*.  
849 *Annual Review of Phytopathology* 44:469-487.
- 850 74. Goodfellow M, Williams S. 1983. Ecology of Actinomycetes. *Annual Reviews in*  
851 *Microbiology* 37:189-216.
- 852 75. Agrios. 2005. Plant pathology, [http://doc18.rupdfbook.com/plant-pathology-fifth-](http://doc18.rupdfbook.com/plant-pathology-fifth-edition-by-george-n-agrios-PDFs-179089.pdf)  
853 [edition-by-george-n-agrios-PDFs-179089.pdf](http://doc18.rupdfbook.com/plant-pathology-fifth-edition-by-george-n-agrios-PDFs-179089.pdf).
- 854 76. Bae C, Han SW, Song Y-R, Kim B-Y, Lee H-J, Lee J-M, Yeam I, Heu S, Oh C-S. 2015.  
855 Infection processes of xylem-colonizing pathogenic bacteria: possible explanations  
856 for the scarcity of qualitative disease resistance genes against them in crops.  
857 *Theoretical and Applied Genetics* 128:1219-1229.
- 858 77. Ewald PW. 1993. *Evolution of infectious disease*. Oxford University Press.
- 859 78. Mansfield J, Genin S, Magori S, Citovsky V, Sriariyanum M, Ronald P, Dow M, Verdier  
860 V, Beer SV, Machado MA. 2012. Top 10 plant pathogenic bacteria in molecular plant  
861 pathology. *Molecular Plant Pathology* 13:614-629.

- 862 79. Shapiro L, De Moraes CM, Stephenson AG, Mescher MC. 2012. Pathogen effects on  
863 vegetative and floral odours mediate vector attraction and host exposure in a  
864 complex pathosystem. *Ecology Letters* 15:1430-1438.
- 865 80. Shapiro LR, Paulson JN, Arnold BJ, Scully ED, Zhaxybayeva O, Pierce N, Rocha J,  
866 Klepac-Ceraj V, Holton K, Kolter R. 2018. An introduced crop plant is driving  
867 diversification of the virulent bacterial pathogen *Erwinia tracheiphila*. *mBio*  
868 9:e01307-18.
- 869 81. Roper MC. 2011. *Pantoea stewartii* subsp. *stewartii*: lessons learned from a  
870 xylem - dwelling pathogen of sweet corn. *Molecular Plant Pathology* 12:628-637.
- 871 82. Smith EF. 1920. An introduction to bacterial diseases of plants. W.B. Saunders  
872 Company, Philadelphia.
- 873 83. Marasco R, Rolli E, Ettoumi B, Vigani G, Mapelli F, Borin S, Abou-Hadid AF, El-  
874 Behairy UA, Sorlini C, Cherif A. 2012. A drought resistance-promoting microbiome is  
875 selected by root system under desert farming. *PLoS One* 7:e48479.
- 876 84. Sgroy V, Cassán F, Masciarelli O, Del Papa MF, Lagares A, Luna V. 2009. Isolation and  
877 characterization of endophytic plant growth-promoting (PGPB) or stress  
878 homeostasis-regulating (PSHB) bacteria associated to the halophyte *Prosopis*  
879 *strobilifera*. *Applied Microbiology and Biotechnology* 85:371-381.
- 880 85. Chung EJ, Park JA, Jeon CO, Chung YR. 2015. *Gynuella sunshinyii* gen. nov., sp. nov., an  
881 antifungal rhizobacterium isolated from a halophyte, *Carex scabrifolia* Steud.  
882 *International Journal of Systematic and Evolutionary Microbiology* 65:1038-1043.
- 883 86. Thong-On A, Suzuki K, Noda S, Inoue J-i, Kajiwarara S, Ohkuma M. 2012. Isolation and  
884 characterization of anaerobic bacteria for symbiotic recycling of uric acid nitrogen  
885 in the gut of various termites. *Microbes and Environments* 27:186-192.
- 886 87. Chan K-G, Tan K-H, Yin W-F, Tan J-Y. 2014. Complete genome sequence of *Cedecea*  
887 *neteri* strain SSMD04, a bacterium isolated from pickled mackerel sashimi. *genomeA*  
888 2:e01339-14.
- 889 88. Farmer J, Sheth NK, Hudzinski JA, Rose HD, Asbury MF. 1982. Bacteremia due to  
890 *Cedecea neteri* sp. nov. *Journal of Clinical Microbiology* 16:775-778.
- 891 89. Aguilera A, Pascual J, Loza E, Lopez J, Garcia G, Liaño F, Quereda C, Ortuño J. 1995.  
892 Bacteraemia with *Cedecea neteri* in a patient with systemic lupus erythematosus.  
893 *Postgraduate Medical Journal* 71:179.
- 894 90. Morrison M, Pope PB, Denman SE, McSweeney CS. 2009. Plant biomass degradation  
895 by gut microbiomes: more of the same or something new? *Current Opinion in*  
896 *Biotechnology* 20:358-363.
- 897 91. Amend A, Burgaud G, Cunliffe M, Edgcomb VP, Ettinger CL, Gutiérrez MH, Heitman J,  
898 Hom EFY, Ianiri G, Jones AC, Kagami M, Picard KT, Quandt CA, Raghukumar S,  
899 Riquelme M, Stajich J, Vargas-Muñiz J, Walker AK, Yarden O, Gladfelter AS. 2019.  
900 Fungi in the marine environment: open questions and unsolved problems. *mBio*  
901 10:e01189-18.
- 902 92. Lofgren LA, LeBlanc NR, Certano AK, Nachtigall J, LaBine KM, Riddle J, Broz K, Dong  
903 Y, Bethan B, Kafer CW. 2018. *Fusarium graminearum*: pathogen or endophyte of  
904 North American grasses? *New Phytologist* 217:1203-1212.

- 905 93. Selosse MA, Schneider - Maunoury L, Martos F. 2018. Time to re - think fungal  
906 ecology? Fungal ecological niches are often prejudged. *New Phytologist* 217:968-  
907 972.
- 908 94. Smillie CS, Smith MB, Friedman J, Cordero OX, David LA, Alm EJ. 2011. Ecology  
909 drives a global network of gene exchange connecting the human microbiome.  
910 *Nature* 480:241-244.
- 911 95. Mancuso FP, D'Hondt S, Willems A, Airoidi L, De Clerck O. 2016. Diversity and  
912 temporal dynamics of the epiphytic bacterial communities associated with the  
913 canopy-forming seaweed *Cystoseira compressa* (Esper) Gerloff and Nizamuddin.  
914 *Frontiers in Microbiology* 7.
- 915 96. Morris JL, Puttick MN, Clark JW, Edwards D, Kenrick P, Pressel S, Wellman CH, Yang  
916 Z, Schneider H, Donoghue PCJ. 2018. The timescale of early land plant evolution.  
917 *Proceedings of the National Academy of Sciences* 15:E2274-E2283.
- 918 97. Boraston AB, Bolam DN, Gilbert HJ, Davies GJ. 2004. Carbohydrate-binding modules:  
919 fine-tuning polysaccharide recognition. *Biochemical Journal* 382:769-781.
- 920 98. Harman GE, Howell CR, Viterbo A, Chet I, Lorito M. 2004. *Trichoderma* species—  
921 opportunistic, avirulent plant symbionts. *Nature Reviews Microbiology* 2:43.
- 922 99. Howell C. 2003. Mechanisms employed by *Trichoderma* species in the biological  
923 control of plant diseases: the history and evolution of current concepts. *Plant*  
924 *Disease* 87:4-10.
- 925 100. Shapiro LR, Scully ED, Straub TJ, Park J, Stephenson AG, Beattie GA, Gleason ML,  
926 Kolter R, Coelho MC, Moraes CMD, Mescher MC, Zhaxybayeva O. 2016. Horizontal  
927 gene acquisitions, mobile element proliferation, and genome decay in the host-  
928 restricted plant pathogen *Erwinia tracheiphila*. *Genome Biology and Evolution*  
929 8:649-664.
- 930 101. Shapiro LR, Scully ED, Roberts D, Straub TJ, Geib SM, Park J, Stephenson AG, Rojas  
931 ES, Liu Q, Beattie G, Gleason M, Moraes CMD, Mescher MC, Fleischer SJ, Kolter R,  
932 Pierce N, Zhaxybayeva O. 2015. Draft genome sequence of *Erwinia tracheiphila*, an  
933 economically important bacterial pathogen of cucurbits. *genomeA* 3:e00482-15.
- 934 102. Kummerfeld SK, Teichmann SA. 2005. Relative rates of gene fusion and fission in  
935 multi-domain proteins. *Trends in Genetics* 21:25-30.
- 936 103. Vannerum K, Huysman MJ, De Rycke R, Vuylsteke M, Leliaert F, Pollier J, Lütz-Meindl  
937 U, Gillard J, De Veylder L, Goossens A. 2011. Transcriptional analysis of cell growth  
938 and morphogenesis in the unicellular green alga *Micrasterias* (Streptophyta), with  
939 emphasis on the role of expansin. *BMC Plant Biology* 11:128.
- 940 104. Van de Poel B, Cooper ED, Van Der Straeten D, Chang C, Delwiche CF. 2016.  
941 Transcriptome profiling of the green alga *Spirogyra pratensis* (Charophyta) suggests  
942 an ancestral role for ethylene in cell wall metabolism, photosynthesis, and abiotic  
943 stress responses. *Plant Physiology* 172:533-545.
- 944 105. McDonald BR, Currie CR. 2017. Lateral gene transfer dynamics in the ancient  
945 bacterial genus *Streptomyces*. *mBio* 8:e00644-17.
- 946 106. Ewald PW. 1994. *Evolution of infectious disease*. Oxford University Press on  
947 Demand.
- 948 107. Mennerat A, Nilsen F, Ebert D, Skorpung A. 2010. Intensive farming: evolutionary  
949 implications for parasites and pathogens. *Evolutionary Biology* 37:59-67.

- 950 108. Pulkkinen K, Suomalainen L-R, Read A, Ebert D, Rintamäki P, Valtonen E. 2010.  
951 Intensive fish farming and the evolution of pathogen virulence: the case of  
952 columnaris disease in Finland. *Proceedings of the Royal Society of London B:*  
953 *Biological Sciences* 277:593-600.
- 954 109. Mira A, Pushker R, Rodríguez-Valera F. 2006. The Neolithic revolution of bacterial  
955 genomes. *Trends in Microbiology* 14:200-206.
- 956 110. Stukenbrock EH, Bataillon T. 2012. A population genomics perspective on the  
957 emergence and adaptation of new plant pathogens in agro-ecosystems. *PLoS*  
958 *Pathogens* 8:e1002893.
- 959 111. McDonald BA, Stukenbrock EH. 2016. Rapid emergence of pathogens in agro-  
960 ecosystems: global threats to agricultural sustainability and food security.  
961 *Philosophical transactions - Royal Society Biological sciences* 371:20160026.
- 962 112. Segev E, Wyche TP, Kim KH, Petersen J, Ellebrandt C, Vlamakis H, Barteneva N,  
963 Paulson JN, Chai L, Clardy J, Kolter R. 2016. Dynamic metabolic exchange governs a  
964 marine algal-bacterial interaction. *eLife* 5:e17473.
- 965 113. Moran M, Belas R, Schell M, Gonzalez J, Sun F, Sun S, Binder B, Edmonds J, Ye W,  
966 Orcutt B. 2007. Ecological genomics of marine Roseobacters. *Applied and*  
967 *Environmental Microbiology* 73:4559-4569.
- 968 114. Kolter R, Chimileski S. 2019. The end of microbiology. *Environmental Microbiology*  
969 20:1955-1959.
- 970 115. Chimileski S, Kolter R. 2017. *Life at the Edge of Sight: A Photographic Exploration of*  
971 *the Microbial World*. Harvard University Press.
- 972 116. Kerff F, Amoroso A, Herman R, Sauvage E, Petrella S, Filée P, Charlier P, Joris B,  
973 Tabuchi A, Nikolaidis N. 2008. PDB ID: 3D30 Crystal structure and activity of  
974 *Bacillus subtilis* Yoaj (EXLX1), a bacterial expansin that promotes root colonization.  
975 *Proceedings of the National Academy of Sciences* 105:16876-16881.
- 976 117. Georgelis N, Yennawar NH, Cosgrove DJ. 2012. (PDB: 4FER) Structural basis for  
977 entropy-driven cellulose binding by a type-A cellulose-binding module (CBM) and  
978 bacterial expansin. *Proceedings of the National Academy of Sciences*:201213200.
- 979 118. Yennawar NH, Li L-C, Dudzinski DM, Tabuchi A, Cosgrove DJ. 2006. (PDB: 2HCZ)  
980 Crystal structure and activities of EXPB1 (*Zea m 1*), a  $\beta$ -expansin and group-1 pollen  
981 allergen from maize. *Proceedings of the National Academy of Sciences* 103:14664-  
982 14671.
- 983 119. Rose PW, Prlić A, Altunkaya A, Bi C, Bradley AR, Christie CH, Costanzo LD, Duarte JM,  
984 Dutta S, Feng Z, Green RK, Goodsell DS, Hudson B, Kalro T, Lowe R, Peisach E, Randle  
985 C, Rose AS, Shao C, Tao Y-P, Valasatava Y, Voigt M, Westbrook JD, Woo J, Yang H,  
986 Young JY, Zardecki C, Berman HM, Burley. SK. 2017. The RCSB protein data bank:  
987 integrative view of protein, gene and 3D structural information. *Nucleic Acids*  
988 *Research* 45:D271-D281.
- 989 120. Pettersen EF, Goddard TD, Huang CC, Couch GS, Greenblatt DM, Meng EC, Ferrin TE.  
990 2004. UCSF Chimera—a visualization system for exploratory research and analysis.  
991 *Journal of Computational Chemistry* 25:1605-1612.
- 992 121. Altschul SF, Gish W, Miller W, Myers EW, Lipman DJ. 1990. Basic local alignment  
993 search tool. *Journal of Molecular Biology* 215:403-410.

- 994 122. Katoh K, Standley DM. 2013. MAFFT multiple sequence alignment software version  
995 7: improvements in performance and usability. *Molecular Biology and Evolution*  
996 30:772-780.
- 997 123. Adl SM, Simpson AG, Lane CE, Lukeš J, Bass D, Bowser SS, Brown MW, Burki F,  
998 Dunthorn M, Hampl V. 2012. The revised classification of eukaryotes. *Journal of*  
999 *Eukaryotic Microbiology* 59:429-514.
- 1000 124. Hug LA, Baker BJ, Anantharaman K, Brown CT, Probst AJ, Castelle CJ, Butterfield CN,  
1001 Hernsdorf AW, Amano Y, Ise K. 2016. A new view of the tree of life. *Nature*  
1002 *Microbiology* 1:16048.
- 1003 125. Federhen S. 2011. The NCBI taxonomy database. *Nucleic Acids Research* 40:D136-  
1004 D143.
- 1005 126. Katoh K, Misawa K, Kuma Ki, Miyata T. 2002. MAFFT: a novel method for rapid  
1006 multiple sequence alignment based on fast Fourier transform. *Nucleic Acids*  
1007 *Research* 30:3059-3066.
- 1008 127. Kalyaanamoorthy S, Minh BQ, Wong TK, von Haeseler A, Jermin LS. 2017.  
1009 ModelFinder: fast model selection for accurate phylogenetic estimates. *Nature*  
1010 *Methods* 14:587.
- 1011 128. Nguyen L-T, Schmidt HA, von Haeseler A, Minh BQ. 2014. IQ-TREE: a fast and  
1012 effective stochastic algorithm for estimating maximum-likelihood phylogenies.  
1013 *Molecular Biology and Evolution* 32:268-274.
- 1014 129. Guindon S, Dufayard J-F, Lefort V, Anisimova M, Hordijk W, Gascuel O. 2010. New  
1015 algorithms and methods to estimate maximum-likelihood phylogenies: assessing the  
1016 performance of PhyML 3.0. *Systematic Biology* 59:307-321.
- 1017 130. Hoang DT, Chernomor O, von Haeseler A, Minh BQ, Le SV. 2017. UFBoot2: Improving  
1018 the Ultrafast Bootstrap Approximation. *Molecular biology and evolution:msx281*.
- 1019 131. Team RC. 2015. R: A language and environment for statistical computing. R  
1020 Foundation of Statistical Computing Vienna, Austria.
- 1021 132. Ronquist F, Huelsenbeck JP. 2003. MRBAYES 3: Bayesian phylogenetic inference  
1022 under mixed models. *Bioinformatics* 19:1572-1574.
- 1023 133. Towns J, Cockerill T, Dahan M, Foster I, Gaither K, Grimshaw A, Hazlewood V,  
1024 Lathrop S, Lifka D, Peterson GD, Roskies R, Scott JR, Wilkins-Diehr N. 2014. XSEDE:  
1025 Accelerating Scientific Discovery. *Computing in Science & Engineering* 16:62-74.
- 1026 134. Chen K-H. 2017. Evolution of fungal endophytes and their functional transitions  
1027 between endophytism and saprotrophism.
- 1028 135. Carroll G. 1988. Fungal endophytes in stems and leaves: from latent pathogen to  
1029 mutualistic symbiont. *Ecology* 69:2-9.
- 1030 136. Yu G, Smith DK, Zhu H, Guan Y, Lam TTY. 2017. ggtree: an R package for  
1031 visualization and annotation of phylogenetic trees with their covariates and other  
1032 associated data. *Methods in Ecology and Evolution* 8:28-36.
- 1033 137. Marchler-Bauer A, Bryant SH. 2004. CD-Search: protein domain annotations on the  
1034 fly. *Nucleic Acids Research* 32:W327-W331.
- 1035 138. Yin Y, Mao X, Yang J, Chen X, Mao F, Xu Y. 2012. dbCAN: a web resource for  
1036 automated carbohydrate-active enzyme annotation. *Nucleic Acids Research*  
1037 40:W445-W451.
- 1038 139. Guy L, Kultima JR, Andersson SG. 2010. genoPlotR: comparative gene and genome  
1039 visualization in R. *Bioinformatics* 26:2334-2335.

- 1040 140. Pánek T, Zadrobílková E, Walker G, Brown MW, Gentekaki E, Hroudová M, Kang S,  
1041 Roger AJ, Tice AK, Vlček Č. 2016. First multigene analysis of Archamoebae  
1042 (Amoebozoa: Conosa) robustly reveals its phylogeny and shows that Entamoebidae  
1043 represents a deep lineage of the group. *Molecular Phylogenetics and Evolution*  
1044 98:41-51.
- 1045 141. Dean R, Van Kan JA, Pretorius ZA, Hammond - Kosack KE, Di Pietro A, Spanu PD,  
1046 Rudd JJ, Dickman M, Kahmann R, Ellis J. 2012. The 'Top 10' fungal pathogens in  
1047 molecular plant pathology. *Molecular Plant Pathology* 13:414-430.  
1048  
1049

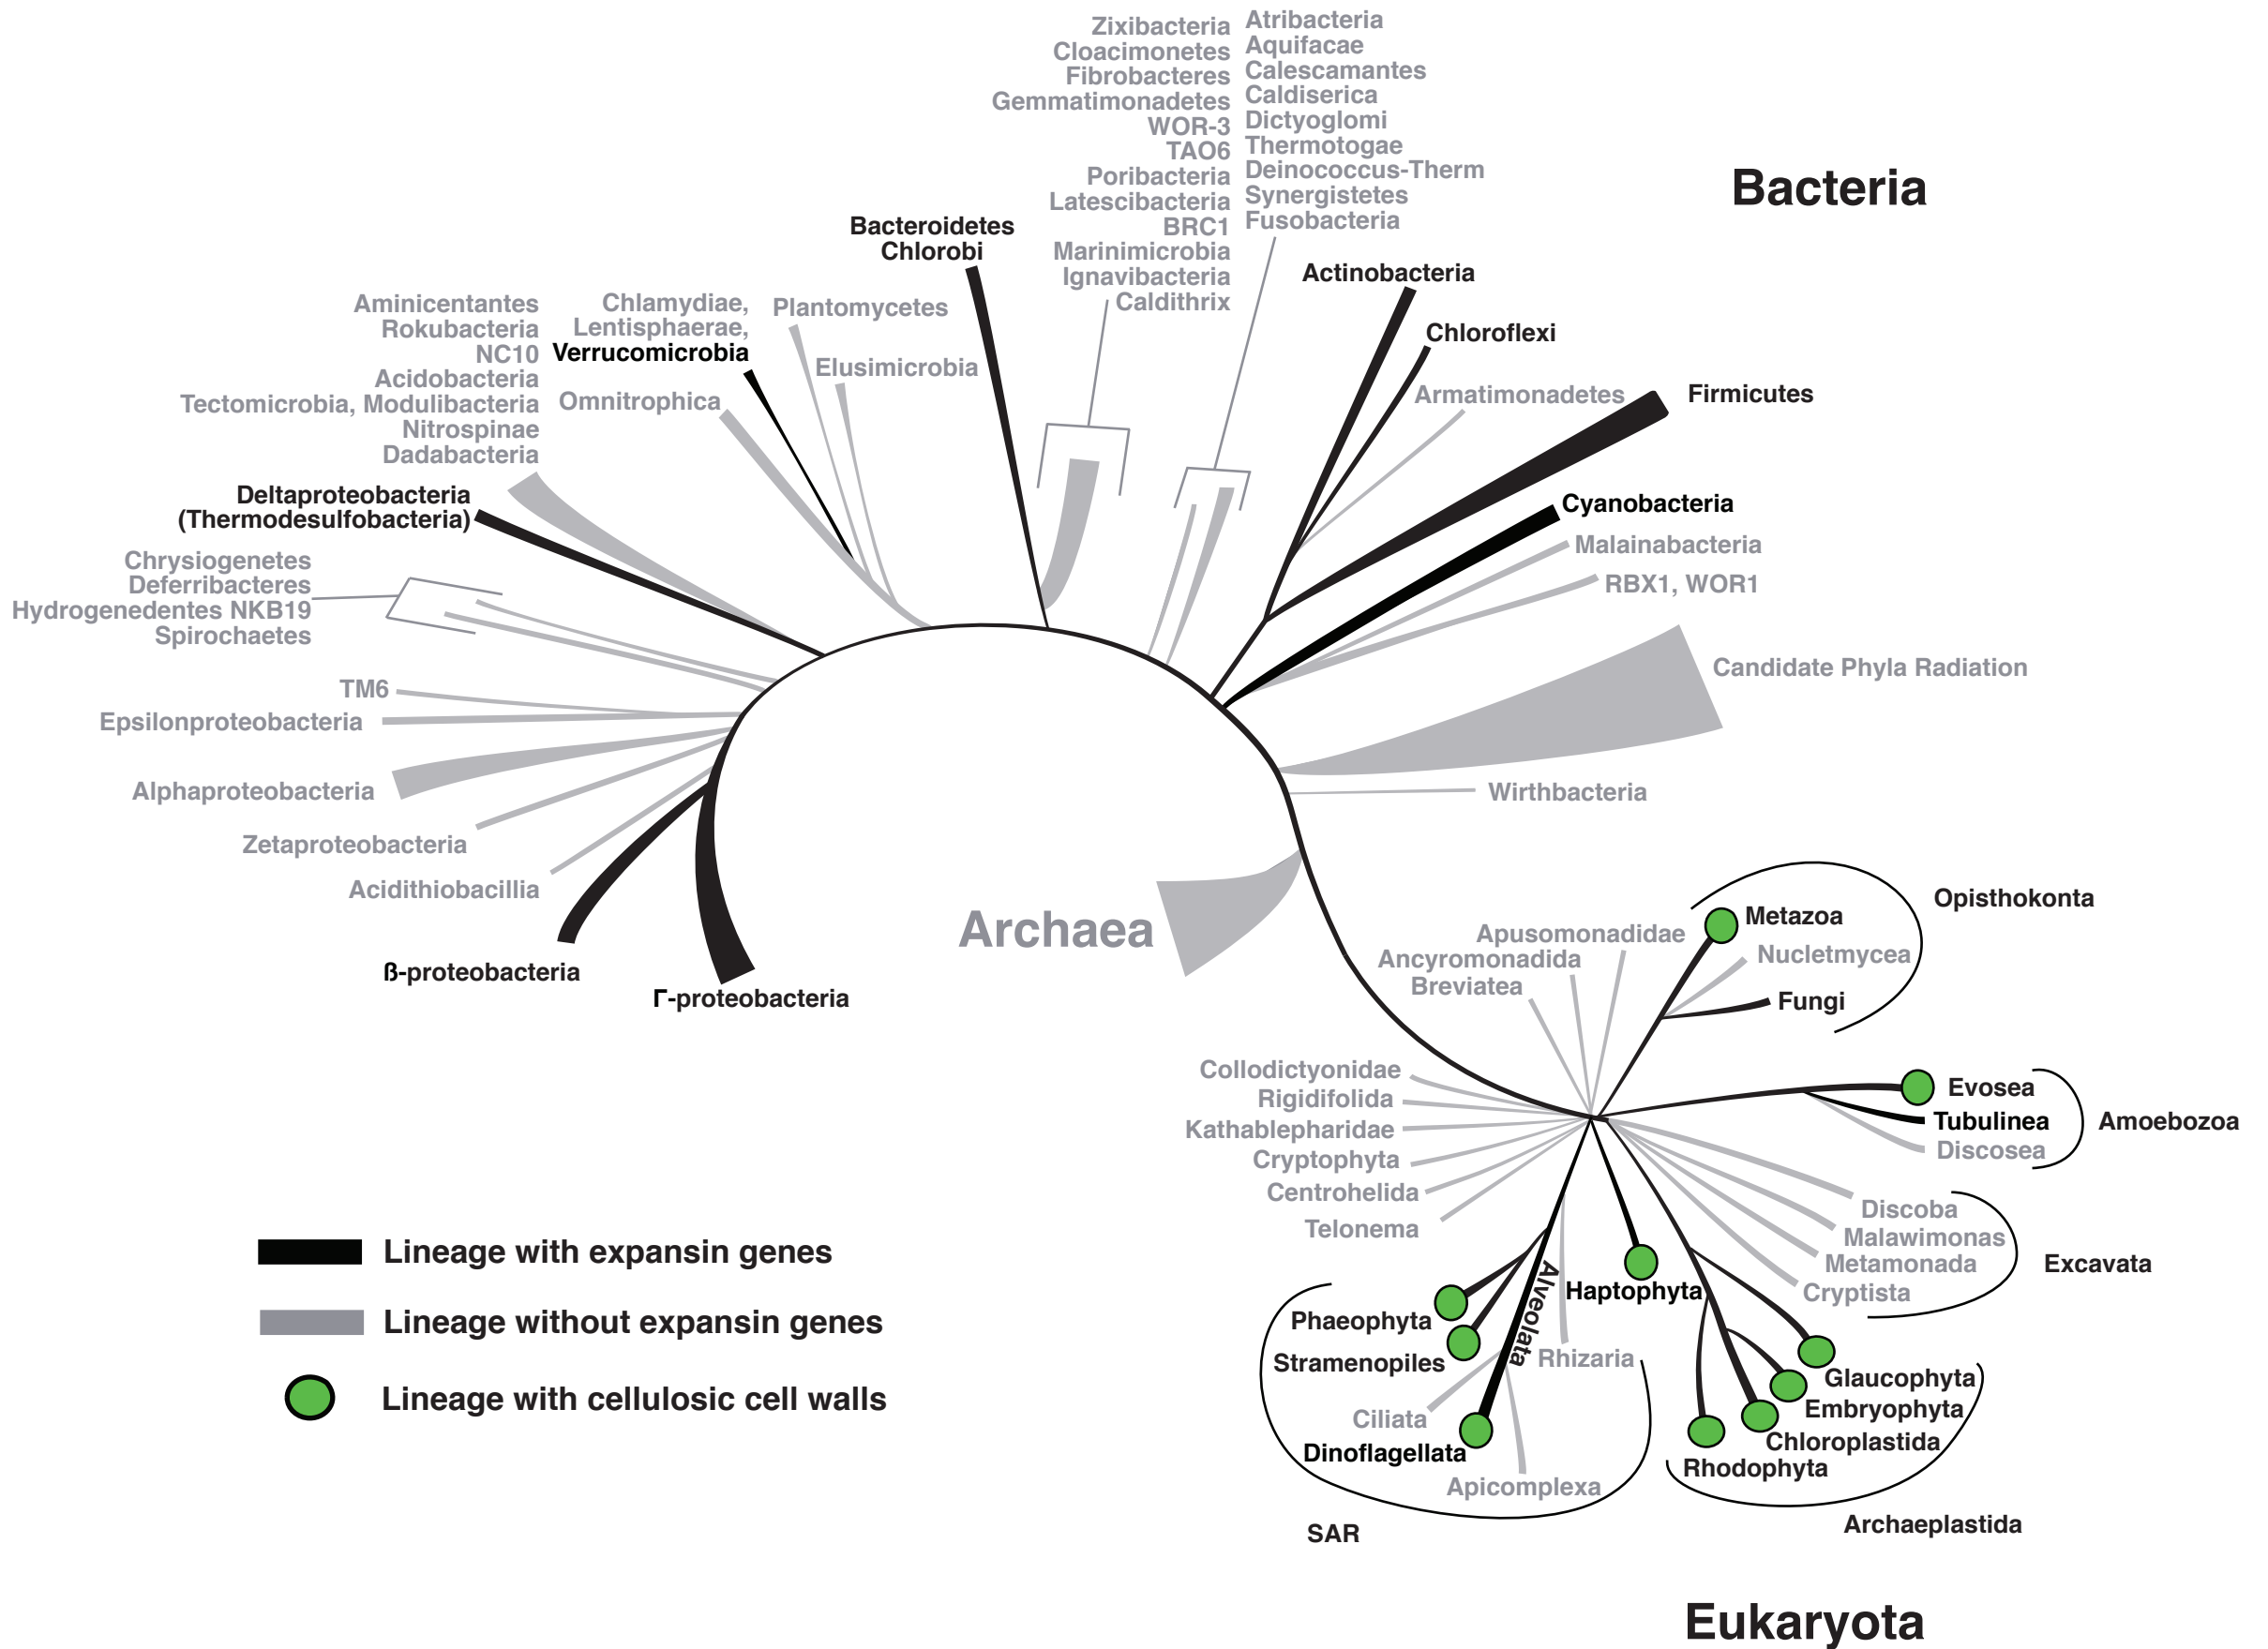



- Ecology**
- Freshwater
  - Gut Microbe
  - Hot Spring or Sulfur Mat
  - Land Plant
  - Marine
  - Plant Commensal
  - Plant Pathogen
  - Saprophyte
  - Soil
  - Wastewater

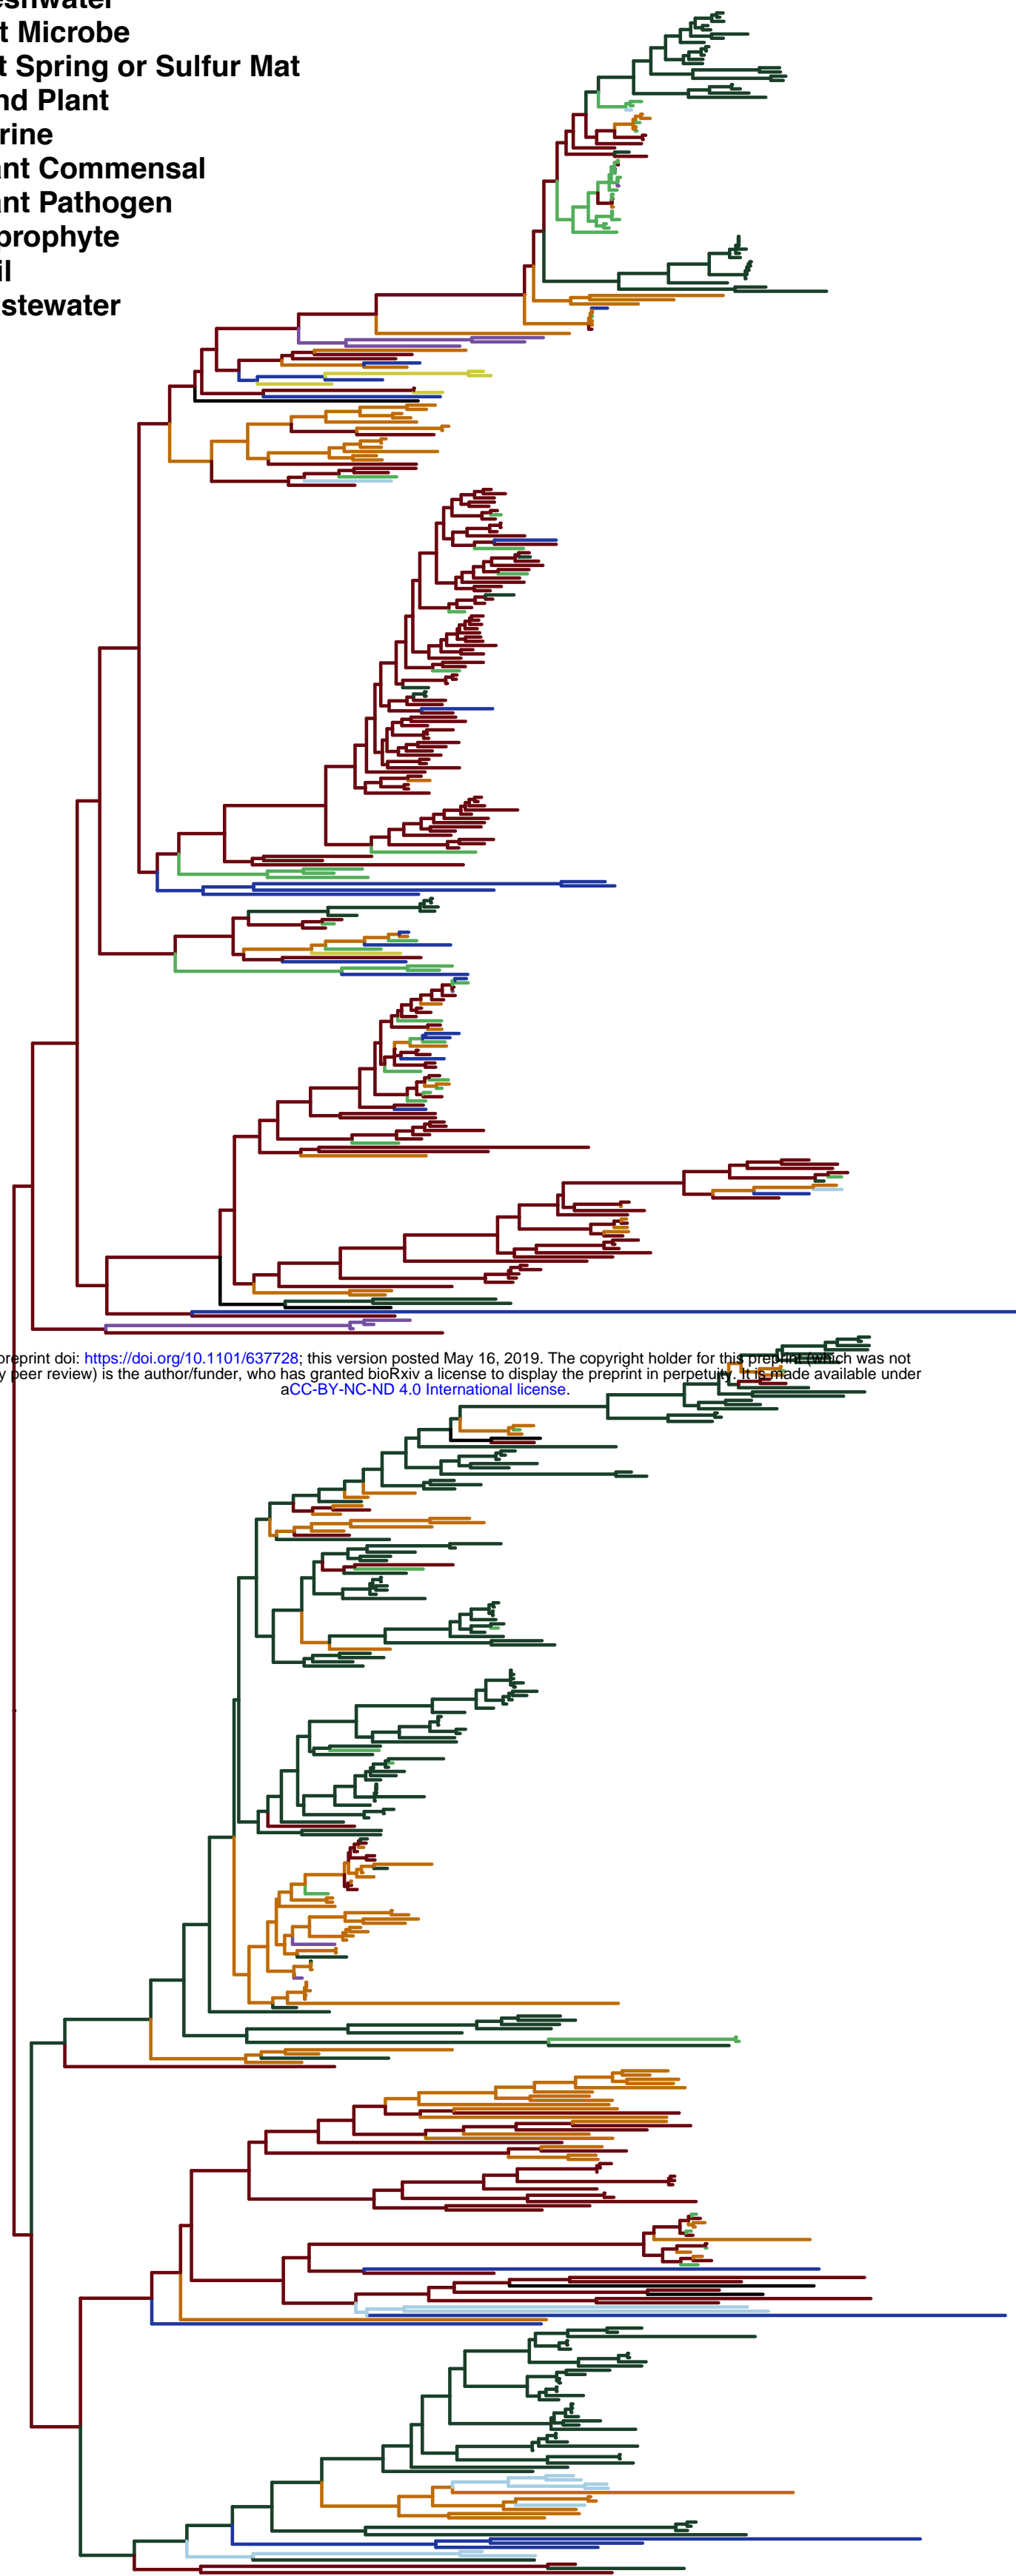

bioRxiv preprint doi: <https://doi.org/10.1101/637728>; this version posted May 16, 2019. The copyright holder for this preprint (which was not certified by peer review) is the author/funder, who has granted bioRxiv a license to display the preprint in perpetuity. It is made available under aCC-BY-NC-ND 4.0 International license.

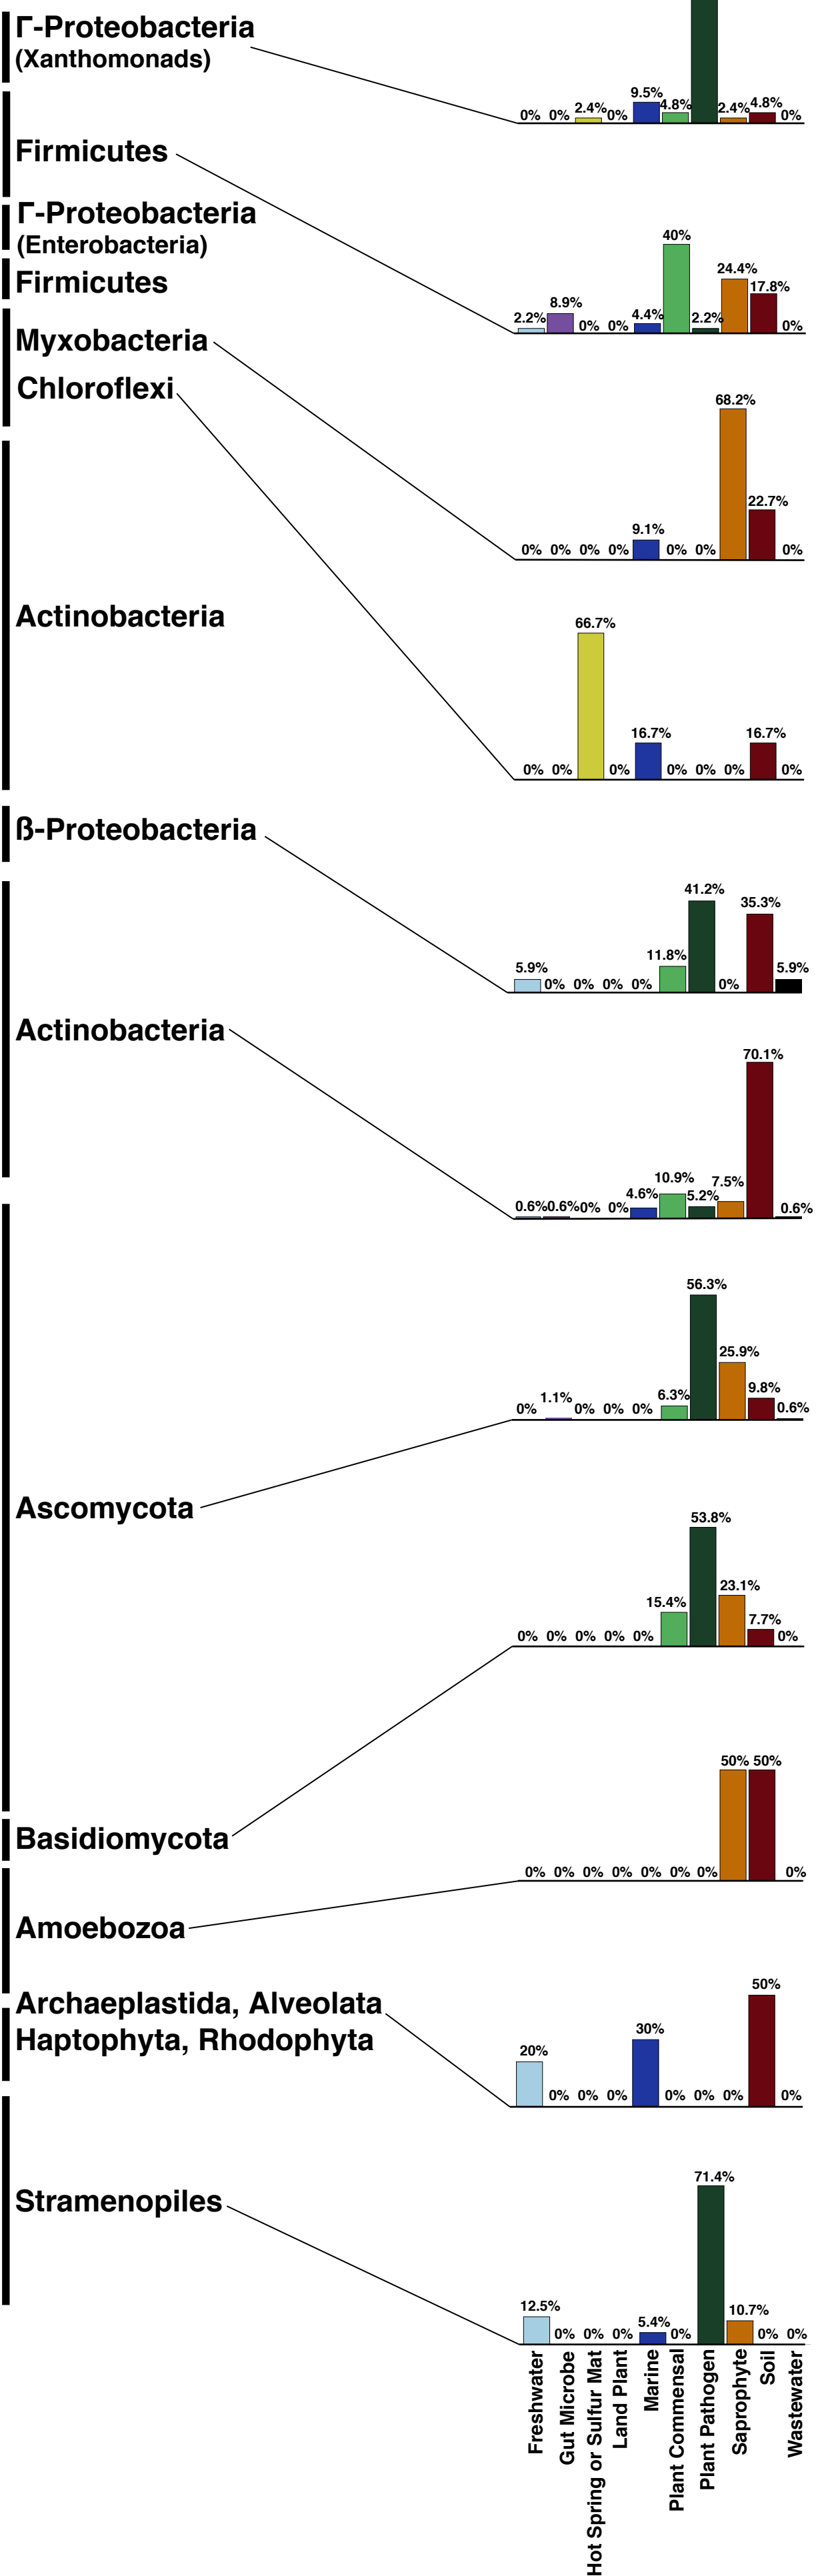



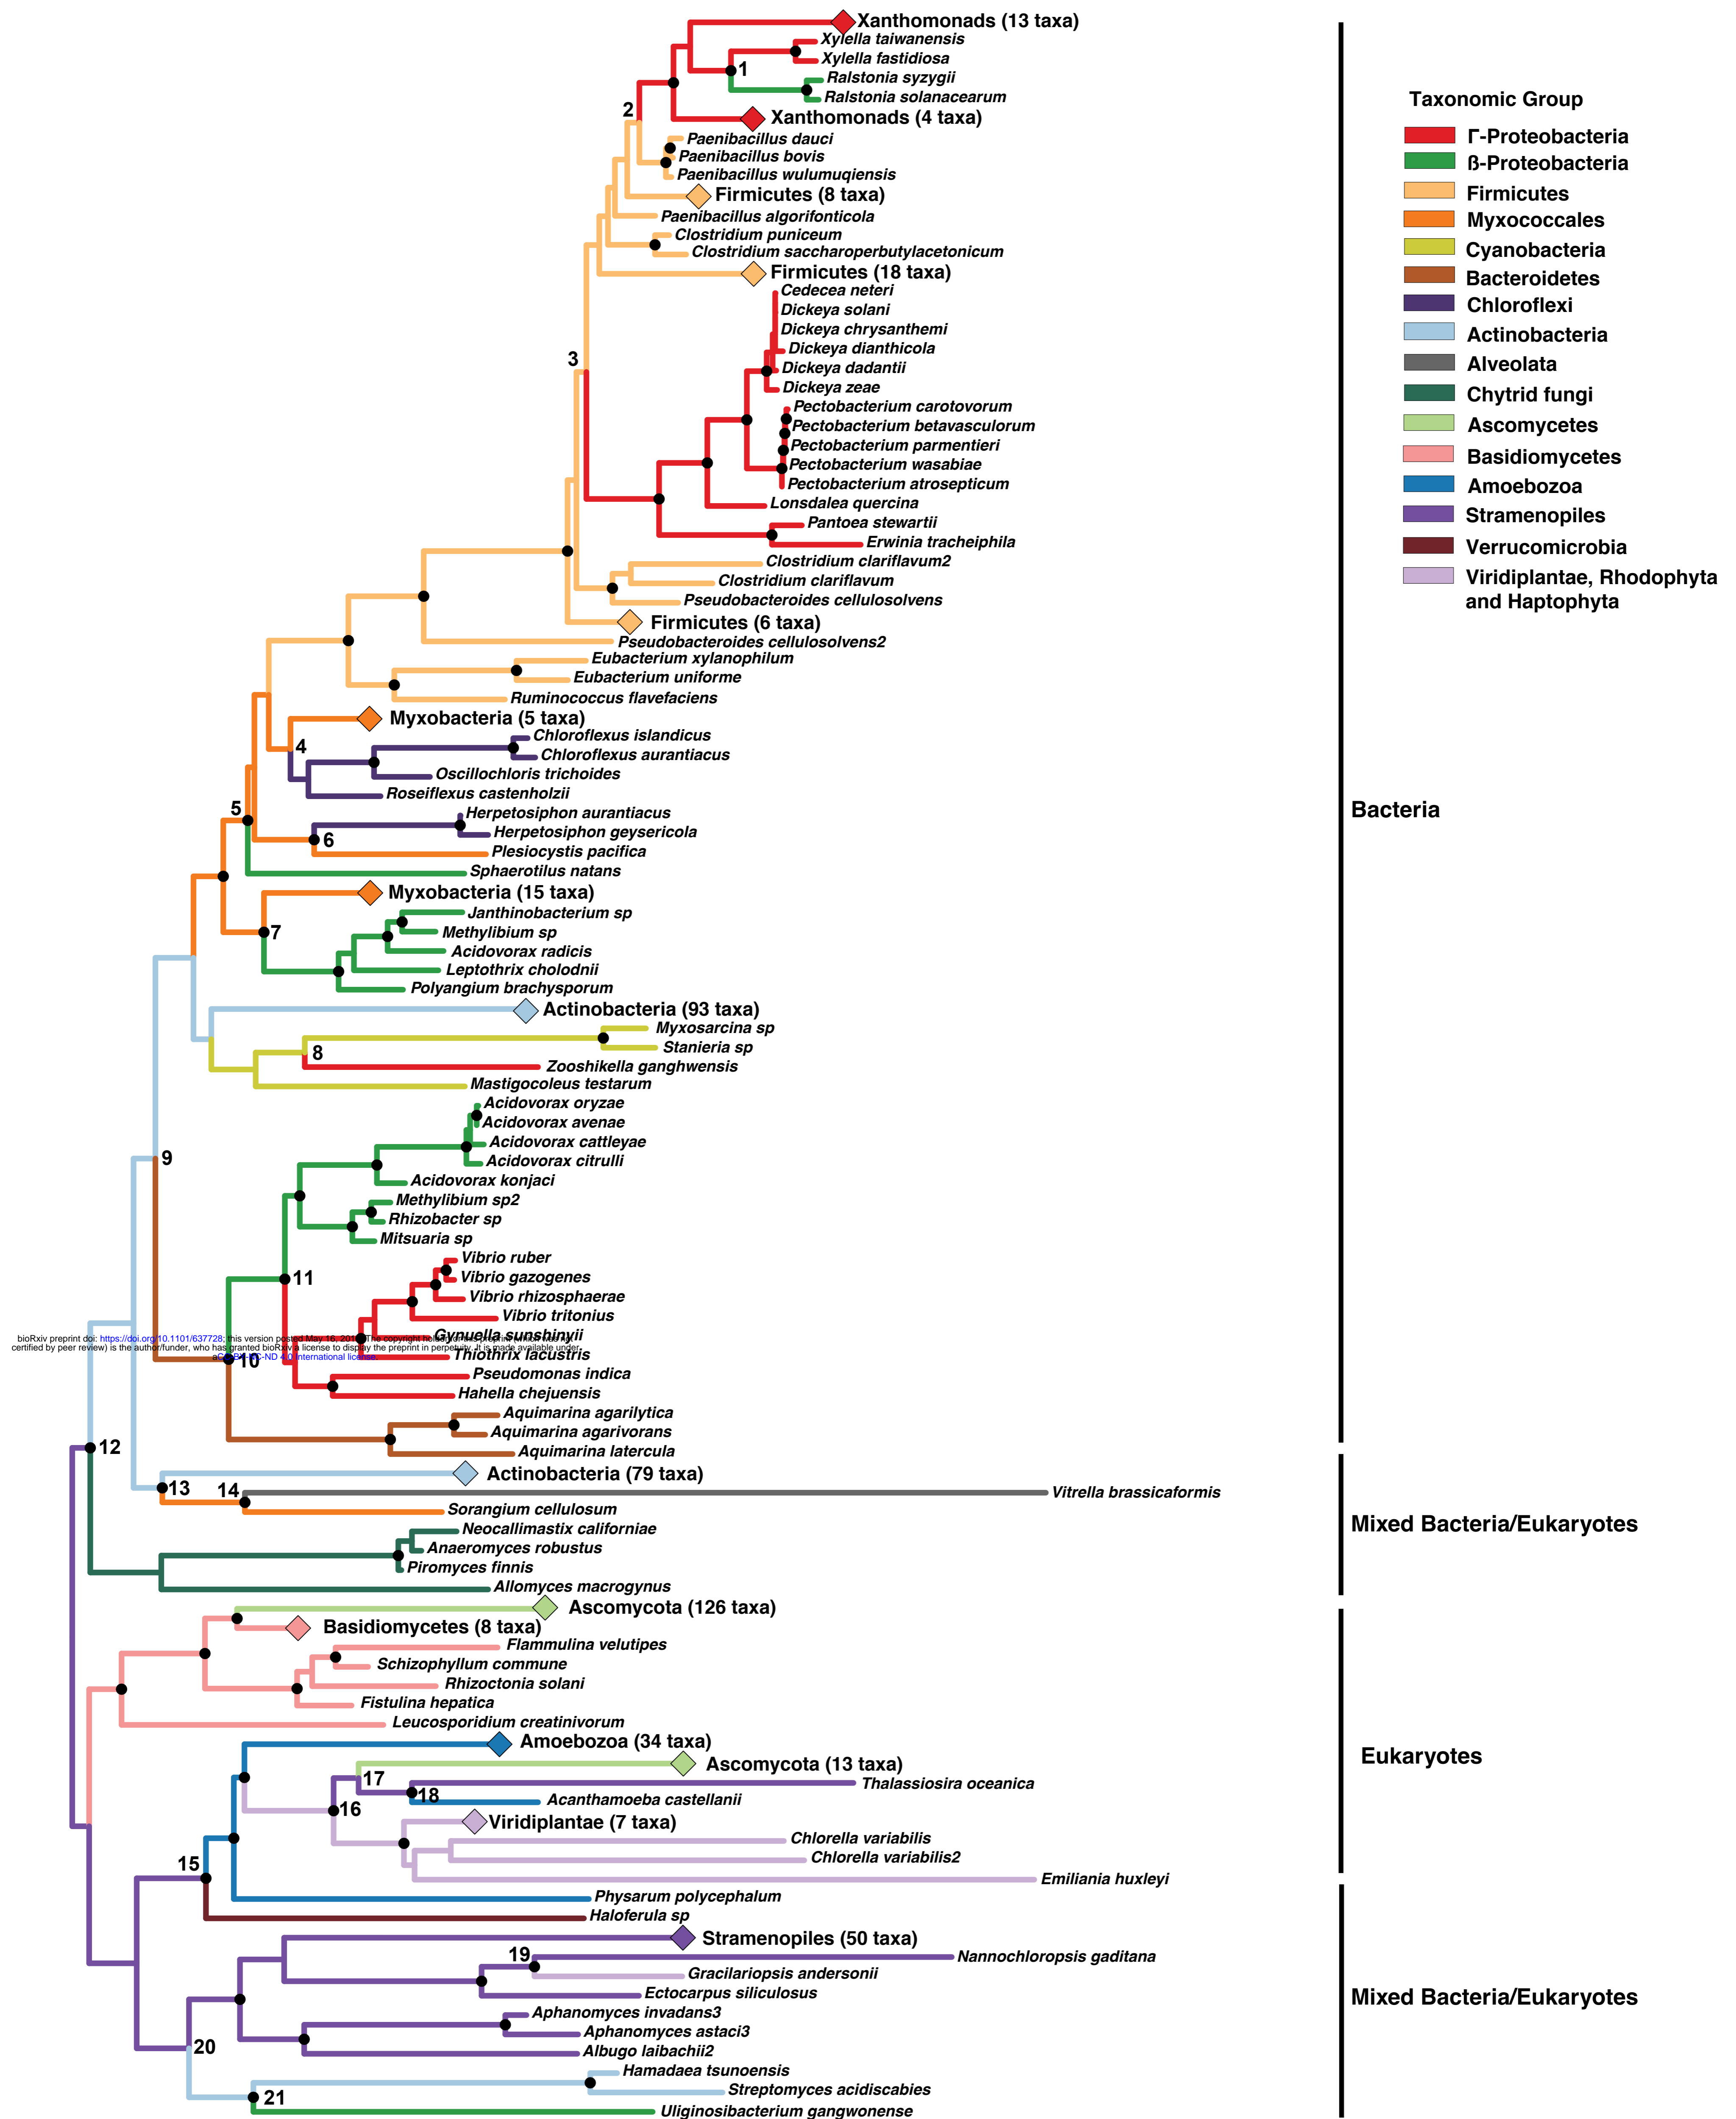

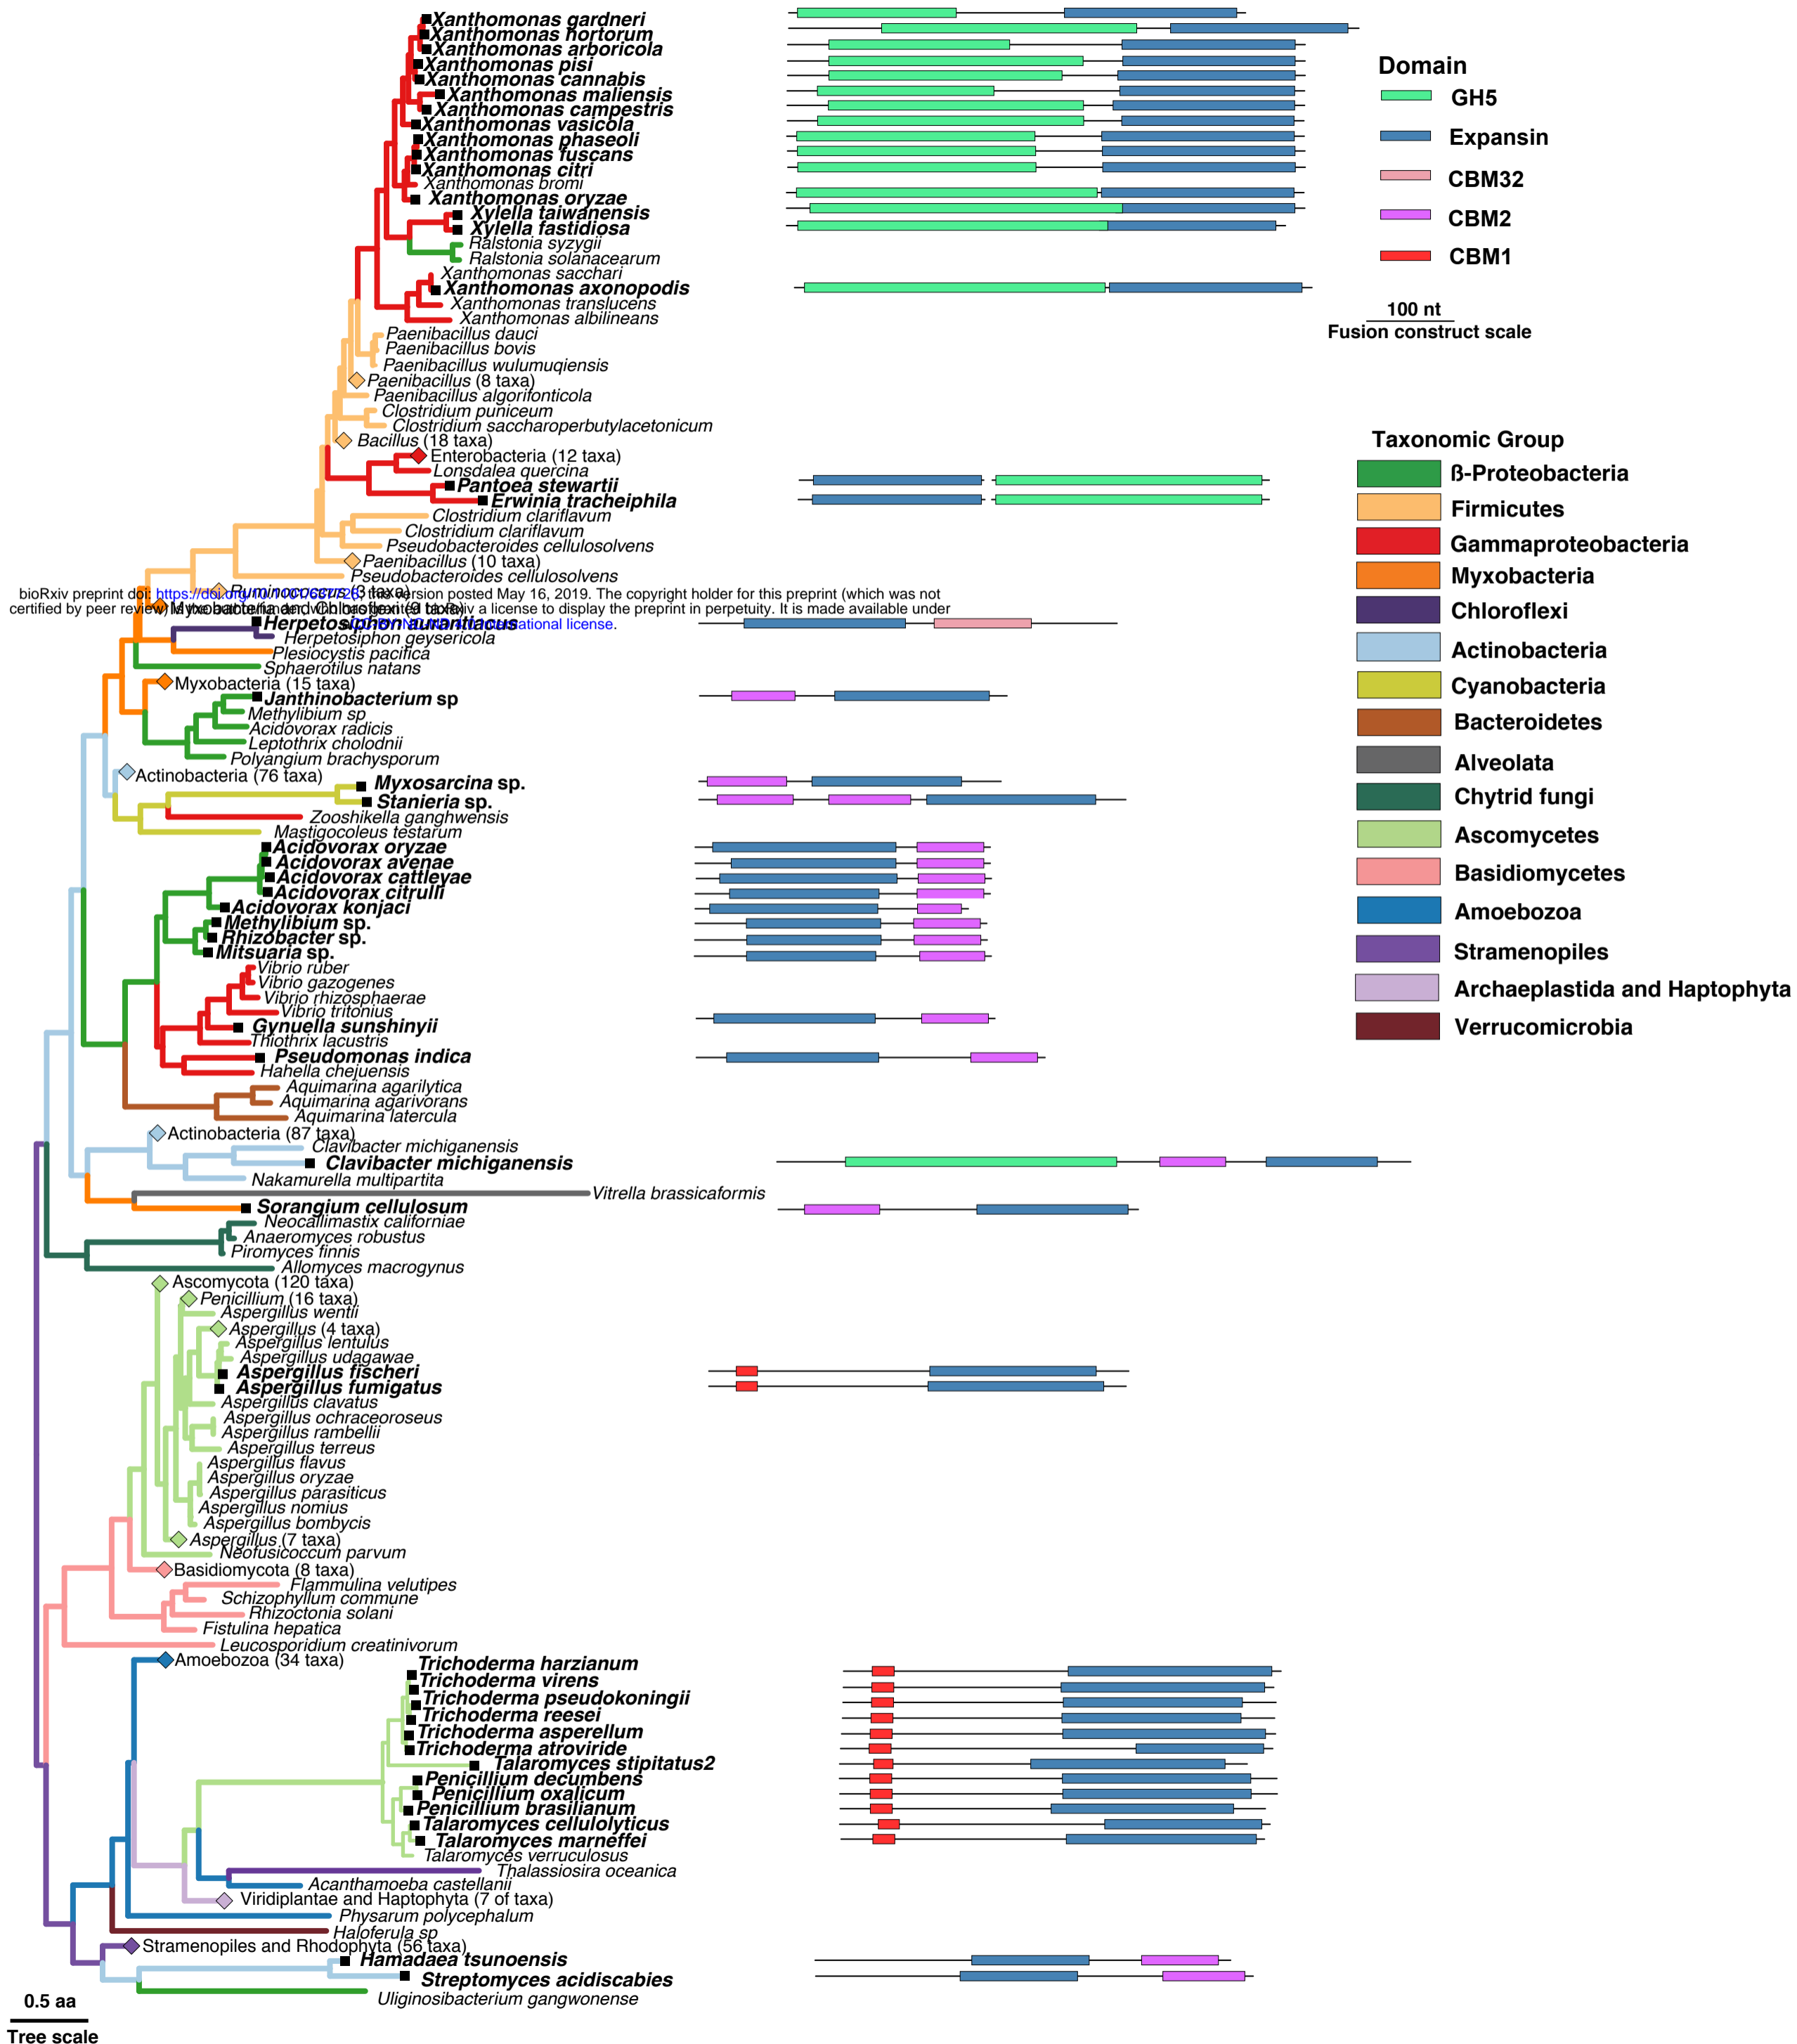

Source: http://biorxiv.org/content/10.1101/637728v1.full.pdf
